# Supplementary material for: Abundance and length of simple repeats in vertebrate genomes are determined by their structural properties
Source: HighWire-hosted journal article supplement (doi:10.1101/gr.078303.108), 2008-08-07
Supplement: MS_SI_R2.pdf [file MS_SI_R2.pdf]

## **Supplementary Information**

### **Abundance and Length of Simple Repeats in Vertebrate Genomes are Determined by their Structural Properties**

Albino Bacolla<sup>1#</sup>, Jacquelynn E. Larson<sup>1</sup>, Jack R. Collins<sup>2</sup>, Jian Li<sup>3,4</sup>, Aleksandar  
Milosavljevic<sup>3,4</sup>, Peter D. Stenson<sup>5</sup>, David N. Cooper<sup>5</sup>, and Robert D. Wells<sup>1</sup>

<sup>1</sup> Institute of Biosciences and Technology, Center for Genome Research, Texas A&M  
University Health Science Center, 2121 West Holcombe Blvd., Houston, TX 77030

<sup>2</sup> Advanced Biomedical Computing Center, Advanced Technology Program,  
SAIC-Frederick, Inc., NCI-Frederick, Frederick, MD 21702

<sup>3</sup> Department of Molecular and Human Genetics and <sup>4</sup> Human Genome Sequencing  
Center, Baylor College of Medicine, Houston, TX 77030, USA.

<sup>5</sup> Institute of Medical Genetics, School of Medicine, Cardiff University, Cardiff CF14  
4XN, UK

# To whom correspondence should be addressed:

Phone (713) 677-7660, Fax (713) 677-7689, Email: [abacolla@ibt.tamhsc.edu](mailto:abacolla@ibt.tamhsc.edu)

## Supplementary Text

**Molecular modeling.** Each of the 62 single-strands (both forward and reverse sequences) comprising the 33 unique genomic tetraNR sequences (Table 1) were modeled to evaluate their capacity to fold back into quasi-stable hairpin structures. Four slipped-frame arrangements were possible for each folded-back sequence. Hydrogen-bonding arrangements with stable base-pairs (*i.e.* C:G, A:T, G:A, G:G, A:A, G:T and G:A) that could form within either a Watson-Crick- or Hoogsteen-type (Saenger 1994) duplex DNA were recorded. From the modeling, it was evident that tetraNRs with self-complementary sequences which yielded hairpin stems with all Watson-Crick base-pairs, were rare or absent from the human genome. Alternatively, tetraNRs in which each strand was modeled into hairpins containing a doublet of CG:CG or GC:GC Watson-Crick base-pairs that alternated with non-Watson-Crick base-pairs, were of intermediate abundance, whilst tetraNRs with folded-back structures devoid of Watson-Crick base-pairs were among the most abundant. Hence, DNA structure modeling laid the foundation for the hypothesis that hairpin formation played a key role in determining tetraNR abundance in the human genome.

**Complex behavior of d(CCCT)<sub>9</sub> and d(CCT)<sub>12</sub>.** As stated in the Results, d(CCCT)<sub>9</sub> and d(CCT)<sub>12</sub> displayed strong hysteresis effects under the *standard assay conditions* (Materials and Methods), with  $T_m$  values >20° C higher than the  $T_a$  values. Since this behavior suggested the slow formation of hairpins following limited cytosine protonation during the prolonged incubation at 25° C prior to the temperature-dependent

absorption spectroscopy (TDAS) melting step, pH-dependent determinations were conducted. For the d(CCCT)<sub>9</sub> oligonucleotide, the biphasic melting curve at pH 4.5 contained two distinct transitions with  $T_m$  values of 76.3 and 83.3° C, respectively. The subsequent annealing curve showed only one transition with a  $T_a$  value of 74.8° C. For both curves, the hypochromicity ranged from ~0.2 to 0.8 from 4° to 95° C. At pH 7.0, the melting curve still displayed two transitions but with the  $T_m$  values reduced to 41.1 and 59.9° C, respectively. The annealing curve also showed a much lowered  $T_a$  at 26.7° C. At pH 8.0, no TDAS changes were observed during either the melting or annealing steps.

For the d(CCT)<sub>12</sub> oligonucleotide, both the melting and annealing curves at pH 4.5 displayed similar transition values at 69.2 and 67.0° C, respectively. However, at pH 7.0, the melting curve showed a  $T_m$  value of 45.7° C whereas the annealing curve showed a  $T_a$  at 19.2° C. At pH 8.0, no TDAS changes were observed during either the melting or annealing steps. Hence, the low pH increased the temperature for the midpoint of transitions and, most importantly, abrogated the hysteresis effects. We conclude that *a*) decreasing the pH from 8.0 to 4.5 induced strong hairpin formation and *b*) the kinetics of hairpin formation was slow at neutral pH but increased sharply with increasing proton concentration. Since cytosine protonation has a  $pK_a$  of ~4.5 for the isolated monomer (Saenger 1994) but has a much higher  $pK_a$  (around neutrality) for the polymeric form (Inman 1964; Jaishree and Wang 1993; Wells and Larson 1972), these data are consistent with hairpin formation at low pH being stabilized by C:C<sup>+</sup> pairs and, possibly, hairpin interactions into quadruplex structures containing i-motifs (Gueron and Leroy 2000).

**Sequences with exceptionally stable or multiple DNA helices.** The self-complementary d(CCGG)<sub>9</sub> and the 3 d(XGGG)<sub>9</sub> oligonucleotides (where X = A, C or T) were predicted to form very stable hairpins and quadruplex structures, respectively. However, no first-derivative peaks were detectable for these 4 oligonucleotides from 10 – 94° C. Since monovalent cations increase helix stability (Hillen et al. 1981), temperature-dependent transitions were performed in the absence of cations (buffer 2, Materials and Methods) and with or without formamide.

With d(CCGG)<sub>9</sub>, no changes in absorbance were observed in the absence of cations (buffer 2). Hence, further determinations were performed in the presence of formamide. Formamide competes with hydrogen bond donor and acceptor groups, thereby destabilizing duplex DNA; 50% formamide was expected to decrease the  $T_m$  by ~30° C (Hutton 1977). A well defined cooperative transition was observed under these conditions, with  $T_m$  and  $T_a$  values of ~74.0° C.

The d(CGGG)<sub>9</sub> oligonucleotide displayed a  $T_a$  value of 54.4° C in buffer 2, indicative of a coil-to-helix transition. Addition of K<sup>+</sup> ions (1 – 100 mM) reduced the extent of hypochromicity from 10% to <3%, implying that the K<sup>+</sup> ions induced a highly thermostable structure. Given the prominent role of K<sup>+</sup> ions in quadruplex formation (Burge et al. 2006), CD was used to probe these DNA structures (Vorlickova et al. 2005; Xu and Sugiyama 2006). CD spectra revealed a moderate maximum at ~264 nm and a minimum at ~242 nm in the absence of cations (Supplementary Fig. 1), a finding which was to be expected from the stacked guanines in the d(CGGG)<sub>9</sub> folded conformation (Kypr and Vorlickova 2002). Addition of K<sup>+</sup> ions (1 – 100 mM) caused a

~3-fold enhancement of the CD spectral signatures, indicative of quadruplex formation (Hardin et al. 2001; Jin et al. 1992; Krishnan-Ghosh et al. 2004; Rachwal et al. 2007b). The 264 nm and 242 nm CD signatures were also enhanced by  $\text{Na}^+$  ions (1 – 100 mM), although to a lesser extent, whereas they remained unchanged by the addition of similar concentrations of  $\text{Li}^+$  (Supplementary Fig. 1, inset). Since quadruplex stabilization by monovalent cations follows the order  $\text{K}^+ > \text{Na}^+ > \text{Li}^+$  (Hardin et al. 2001), these composite data are consistent with the conclusion that d(CGGG)<sub>9</sub> formed a quadruplex structure (Hardin et al. 1992; Kettani et al. 1998) under the *standard assay conditions*, with a  $T_a$  >94° C.

The d(GGGT)<sub>9</sub> oligonucleotide displayed no temperature-dependent changes in absorbance in buffer 2. However, addition of 50% formamide yielded a reversible coil-to-helix transition with a  $T_a$  of 74.0° C, indicating that d(GGGT)<sub>9</sub> formed a stable hydrogen-bonded structure. CD spectra in the absence of cations showed a prominent maximum (~30 mdeg) at ~264 nm and a minimum (~-10 mdeg) at ~242 nm, which were increased only moderately (~10-20%) upon addition of either  $\text{K}^+$  or  $\text{Na}^+$  (not shown). Hence, we conclude that d(GGGT)<sub>9</sub> formed stable quadruplex structures under all assay conditions (Krishnan-Ghosh et al. 2004).

The d(AGGG)<sub>9</sub> oligonucleotide displayed complex behavior. In the absence of cations, a cooperative coil-to-helix transition was observed with a  $T_a$  value of 49.5° C, preceded by linear decreases in absorbance at higher temperatures. Strong hysteresis was also observed, such that the melting (helix-to-coil) curve was hypochromic with respect to the annealing (coil-to-helix) curve in the linear range above the midpoint of transitions. We conclude that d(AGGG)<sub>9</sub> folded into a hairpin structure, and that in the

single-stranded d(AGGG)<sub>9</sub> all bases stacked with slow kinetics to form helical coils. Addition of  $\geq 10$  mM K<sup>+</sup> ions abrogated the cooperative transitions but did not alter the steady change in absorbance which occurred a) over the entire temperature range and b) only during the melting step. Hence, K<sup>+</sup> ions both impeded hairpin formation and reduced the kinetics of base stacking. CD spectra indicated a strong maximum at ~264 nm and a minimum at ~242 nm in the absence of cations; these amplitudes increased by ~20% in the presence of  $\geq 10$  mM K<sup>+</sup>. These CD data were consistent with the presence of stacked guanines, both in the d(AGGG)<sub>9</sub> hairpin in the absence of K<sup>+</sup>, as well as in the single-stranded coils in the presence of K<sup>+</sup> (Kypr and Vorlickova 2002).

The most likely hydrogen bonds in the d(AGGG)<sub>9</sub> hairpin occurred through Hoogsteen interactions between G:G and A:A bases (Huertas and Azorin 1996; Saenger 1994). This arrangement affords a fully base-paired hairpin stem. Hoogsteen G:G and A:A interactions are typically observed in triplex DNA where they are stabilized by Mg<sup>2+</sup> ions (Liquier et al. 2001). Addition of up to 100 mM Mg<sup>2+</sup> ions increased the  $T_a$  value of d(AGGG)<sub>9</sub> to 54.7° C and also minimized hysteresis, indicating that the divalent cation stabilized the hairpin structure and accelerated the kinetics of base stacking. Surprisingly, the combined presence of 10 mM Mg<sup>2+</sup> and  $\geq 10$  mM K<sup>+</sup> ions did not yield any temperature-dependent changes in absorbance, either during the melting or annealing steps. In addition, K<sup>+</sup> ions did not increase the CD amplitudes of the ~264 and ~242 nm peaks, which were observed in the presence of Mg<sup>2+</sup> alone, strongly supporting the formation of a quadruplex structure, perhaps from the association of two d(AGGG)<sub>9</sub> hairpins. In summary, the d(AGGG)<sub>9</sub> oligonucleotide formed a quadruplex structure at K<sup>+</sup> and Mg<sup>2+</sup> concentrations of 100 mM and 10 mM,

respectively, a helical (possibly a hairpin) structure in the presence of 10 mM  $\text{Mg}^{2+}$  and  $<10$  mM  $\text{K}^+$  ions, and a single-stranded coil in the presence of  $\leq 0.5$  mM  $\text{Mg}^{2+}$  ions and  $\geq 10$  mM  $\text{K}^+$  ions.

The numbers of CCGG, CGGG, TGGG and AGGG tetraNRs in the human genome were 0, 0, 4 and 539, respectively (Table 1). A comparison (Rachwal et al. 2007a) of the relative stabilities adopted by XGGG quadruplexes indicated that the  $\text{d}(\text{AAAG})_4$  sequence forms much less stable structures than the  $\text{d}(\text{CGGG})_4$  and  $\text{d}(\text{TGGG})_4$  sequences in the presence of  $\text{K}^+$  ions alone. Taken together these biophysical investigations support the existence of an inverse relationship between the capacity of single-stranded tetraNRs to form DNA hairpin and quadruplex secondary structures and their abundance in the human genome.

**Note regarding the “ $T_a$  and tetraNR abundance are inversely correlated” section.** We choose to plot the highest  $T_a$  value for each pair of tetraNR sequences (Table 1) for the following reason. When double-stranded chromosomal DNA separates into single-strands during replication or transcription, a hairpin may form at a certain location on one strand but not on its complement due to their inherently different thermodynamic stabilities. If bypass of the hairpin were then to occur during DNA replication, this would result in the loss of the repeat sequence in some of the progeny molecules (Iyer et al. 2000; Zahra et al. 2007). Alternatively, if the hairpin were to induce double-strand breaks, subsequent repair could remove the repeat sequence, possibly along with flanking sequences (Wojciechowska et al. 2006). Thus, this duplex region would tend to be lost from the population over time. Moreover, this loss would

depend on the most stable hairpin that would form on either one or the other strand of a given duplex DNA sequence.

**$T_a$  vs. tetraNR abundance correlation with projected numbers of CpG-containing tetraNRs.** To determine whether the correlation between  $T_a$  and tetraNR abundance was due solely to the very low number of CpG-containing repeats, we reassessed this correlation after projecting the expected number of CpG-containing tetraNRs as if they had not been lost through methylation-mediated C:G  $\rightarrow$  T:A transitions, as follows.

First, we compared the number of CpG-containing tetraNRs of length 3 units with the number of GpC-containing tetraNRs also of length 3 units. The average number of GpC-containing tetraNRs (ATGC, AAGC, AGCC, AGCT and AGGC) was  $4004 \pm 1639$  (mean  $\pm$  SE). The numbers of CpG-containing tetraNRs varied from 22 to 1504. Three groups were then formed. Group A contained the 3 tetraNR sequences with 50% C+G content, *i.e.* AACG, ACGT and ATCG. Group B contained the 4 sequences with 75% C+G content, *i.e.* ACCG, ACGG, AGCG and ACGC, whereas group C contained the 2 sequences with 100% C+G, *i.e.* CCCG and CCGG. The average numbers of repeats were:  $45 \pm 3$  (group A),  $301 \pm 141$  (group B) and  $920 \pm 584$  (group C), corresponding to 88-, 13- and 4-fold reductions, respectively, relative to the 4004 value for the GpC-containing repeats. This increase in mean number of repeats with increasing C+G content is consistent with expectation since the kinetics of CpG methylation (Bacolla et al. 2001), spontaneous deamination (Frederico et al. 1993; Lindahl and Nyberg 1974) and C:G  $\rightarrow$  T:A transition rates (Elango et al. 2008) all



decrease with increasing DNA stability. The CCCG and CCGG repeats were not considered further since their relative  $T_a$  values exceeded 94° C (Table 1). Hence, the “observed” numbers of CpG-containing tetraNRs were each multiplied by 88 (group A) and 13 (group B) and named the “corrected” numbers of CpG-containing tetraNRs.

Second, we projected the total numbers of tracts  $\geq 8$  units for each CpG-containing tetraNR. This was performed by reference to the rate of tetraNR loss as a function of length, determined for the GpC-containing tetraNRs. A plot of tract length (number of repeat units  $x$ ,  $x = 3 - 8$ ) as a function of the natural log of the number of tracts ( $Y_L$ ) was described ( $r^2 > 0.98$ ) by a 3-parameter exponential decay,  $Y_L = Y_{OL} + A * e(\exp) - \langle B \rangle * x$ . The average slope ( $\langle B \rangle$ ) value for the GpC-containing tetraNRs was  $0.363 \pm 0.159$  (SD). The projected numbers of CpG-containing tetraNRs with  $\geq 8$  units was therefore obtained from the relationship  $\ln Y_{Li} = \ln Y_{L3} + \langle B \rangle * (x_3 - x_i)$ , where  $Y_{L3}$  was the corrected number of each CpG-containing tetraNR with 3 units,  $x_3 = 3$  and  $x_i$  the projected length in repeat units. The values obtained in the range of  $i = 8 - 15$  were then added to give the total number of tracts  $\geq 8$  units for each CpG-containing tetraNRs. A second calculation was also performed by using the smallest observed  $B$  value ( $B_{min} = 0.199$ ) as to give an upper limit for the projected numbers of tetraNR tracts. The total numbers of projected tetraNR tracts ranged from 12-16 using  $\langle B \rangle$  and 33-73 using  $B_{min}$ . A plot of  $T_a$  vs. numbers of tracts was then performed by using the projected numbers instead of the observed numbers of CpG-containing tetraNRs. Using  $\langle B \rangle$ , the correlation improved somewhat as compared to the uncorrected correlation ( $P = 0.0068$  vs.  $0.0283$ ), whereas it deteriorated to a marginally non-significant level ( $P = 0.0552$ ) using  $B_{min}$ . In conclusion, the loss of CpG-containing tetraNRs through C:G  $\rightarrow$  T:A

transitions consequent to methylation-mediated deamination does not appear to be the underlying cause for the observed correlation between  $T_a$  and the abundance of tetraNR tracts in the human genome.

**Note regarding the “ $T_a$  determinations in triNRs” section.** The d(CCT)<sub>12</sub> oligonucleotide displayed hysteresis effects and pH-dependent  $T_a$  values due to cytosine protonation (see above) and therefore only the  $T_a$  value of 19.2° C at pH 7.0 was considered. Moreover, no sequences were found to adopt quadruplex structures under *standard assay conditions* (Materials and Methods).

**$\Delta G_v$  values in control A-rich sequences.** To determine whether or not the correlations between  $\Delta G_v$  values and TDAS slopes were due solely to the A-rich nature of the tetraNR and triNR sequences, the average  $\Delta G_v$  value was calculated for three 20-mer single-stranded DNA sequences containing 13/20, 14/20 and 15/20 A-residues within non-repetitive DNA. The  $\Delta G_v$  values were: for sequence 1 (TAACAAAGACAATAAAATAC) -6.72 kcal/mol, for sequence 2 (AAGAACACAAATAATAACA) -6.72 kcal/mol and for sequence 3 (ACAAACAATAAAAACAACAA) -6.62 kcal/mol. These values are less negative than those calculated for the AAAG, AAGG and AAG repeats, thereby supporting the conclusion that the correlations between the  $\Delta G_v$  values and TDAS slopes were not due simply to the A-rich nature of the tetraNR and triNR sequences.

**Disclaimer.** The content of this publication does not necessarily reflect the

views or policies of the Department of Health and Human Services, nor does mention of trade names, commercial products, or organizations imply endorsement by the U.S.

Government.

## Supplementary Figure Legends and Notes

**Supplementary Fig. 1.** CD spectra of the d(CGGG)<sub>9</sub> oligonucleotide. A total of 0.6 OD<sub>260</sub>/ml (2 μM) of d(CGGG)<sub>9</sub> was dissolved in buffer 2 (Materials and Methods) with or without increasing concentrations of KCl (*left inset*) to determine whether the metal ion induced quadruplex formation. The solutions were equilibrated overnight at 25° C and CD analyses were performed at 25° C. Each trace represents the average of 10 determinations. *Right Inset*, the d(CGGG)<sub>9</sub> oligonucleotide was equilibrated overnight at 25° C as before in the presence of KCl (1 – 100 mM), NaCl (1 – 100 mM) or LiCl (1 – 100 mM) and the CD spectra were recorded. The mdeg values obtained at 264 nm were then replotted as a function of increasing monovalent cation concentrations.

**Supplementary Fig. 2.**  $T_a$  vs. tetraNR abundance as a function of tract length. Six different regression coefficients ( $r^2$ ) were determined. Each  $r^2$  value was obtained from the analysis described in Fig. 1. However, the numbers of genomic tetraNRs analyzed in the 9 combined vertebrate genomes varied in length so that tracts containing  $\geq 8$ ,  $\geq 7$ ,  $\geq 6$ ,  $\geq 5$ ,  $\geq 4$  and  $\geq 3$  units, each yielded a separate  $r^2$  value. These six  $r^2$  values (y-axis) were plotted against the corresponding genomic tetraNR unit lengths (TUL) analyzed (x-axis) and the data were fitted by a rectangular hyperbola of the form  $[(ax)/(b+x) + cx]$ .

**Supplementary Fig. 3.**  $T_a$  values as a function of d(ACTG)<sub>n</sub> oligonucleotide

repeat number,  $n$ . Four self-complementary oligonucleotides comprising  $n = 4, 6, 9$  and 12 d(ACTG) $_n$  tetraNRs were used to determine the length-dependent changes in  $T_a$ . For each length, 0.8 OD<sub>260</sub> of oligonucleotide was incubated overnight at 25° C in 1 ml of buffer 1 and used to determine the  $T_a$  values. Given the d(ACTG) $_n$  self-complementarity, the oligonucleotides may form regular duplexes. Hence, the  $T_a$  values reflect the stability of the stem (not allowing for the loop) of folded-back oligonucleotides with twice as many tetraNR units.

**Supplementary Fig. 4.** Distribution of human triNRs in genes and intergenic regions. The triNR sequences were categorized according to their location either in intergenic regions or within RefSeq annotated genes (introns and exons, cDNAs) and expressed as percentage values. When a triNR tract overlapped an exon/intron boundary, it was classified as residing within the coding region. Similarly, when a triNR tract was located both within an intron and an exon as a result of alternative splicing, it was classified as being located within the coding region. A cut-off value of 10% was taken as a measure of significant localization within coding regions. Hence, only triNR sequences with a total number of tracts >10 were considered. The numbers of tracts for each sequence are indicated above the bars. The vertical dashed line separates the sequences with >10 tracts from those with ≤10 tracts. *Panel A*, triNR sequences with ≥10 units; *panel B*, triNR sequences with ≥4 units.

**Supplementary Fig. 5.** Distribution of human tetraNRs in genes and intergenic regions. All details are the same as in Supplementary Fig. 4 but for tetraNRs. *Panel*

A, tetraNR sequences with  $\geq 8$  units; *panel B*, tetraNR sequences with  $\geq 3$  units.

**Supplementary Fig. 6.** Micro/minisatellites in human cDNAs and their encoded amino acids. *Panel A.* Human RefSeq cDNA genes were analyzed for their content of micro/minisatellites, *i.e.* any tandem repeat sequence composed of a)  $\geq 2$  repeat units, b) a total of  $\geq 12$  nt in length (examples include  $(CA)_6$ ,  $(CTG)_4$ ,  $(CCAT)_3$ ,  $(GGATC)_3$ ,  $(TTCTAC)_2$  etc.) and c) 2 – 11 nt per repeat unit. When a redundant genomic location was found in different cDNAs, it was counted only once. *Panel B,* the diNRs and triNRs from panel A were classified according to their location in cDNAs at the start of transcription (START), in the 5' untranslated region (5'-UTR), the open reading frame (ORF), and the 3' untranslated region (3'-UTR). Repeats at START coincided with heterogeneous transcription start sites found in several expressed sequence tags (ESTs). For the classification, the location of all diNRs and triNRs was verified manually on the UCSC Human Genome Browser. This analysis was performed on the hg17 Genome Assembly of 2004. *Panel C,* the genomic coordinates corresponding to micro/minisatellites located in the ORF regions from Panel B were used to retrieve the amino acids encoded by the repeats, which were then computed. All homopolymeric amino acid runs encoded by triNRs and hexaNR were recorded (the hexaNRs only made a minor contribution). For heteropolymeric amino acid runs, only diamino acid runs (ER, CV and TH) encoded by diNRs were found to be present in significant number. No aromatic F, Y and W (boxed) homopolymeric amino acid runs were found. The amino acids were further classified according to which translated exon (first, internal, last, and single) encoded them, and the percentage values were recorded.

Internally translated exons encoded preferentially polyQ, polyE and polyS runs, 58, 57 and 54%, respectively. By contrast, the first translated exon encoded preferentially polyA, polyL, polyG, polyP and polyH. The inset shows the results for polyA, polyL, polyG and polyP. *Panel D*, cartoon showing the side chain similarities between Q and E.

**Supplementary Fig. 7.** Evolutionary conservation of three human coding triNR tracts. *Panel A*, alignment of the protein sequence flanking an evolutionarily conserved polyQ amino acid run (*boxed*) in the *TBP* gene encoding the TATA-box binding protein (*upper*), followed by a proposed alignment of the conserved CAG/CAA tract (*below*) encoding the boxed polyQ run. The database sources for the protein sequences are indicated. This analysis was conducted on all available genomes at the UCSC Genome Browser (<http://genome.ucsc.edu>). The TATA-box binding protein is an essential component of the transcription factor IID (TFIID), a multi-peptide complex which recruits other basal transcription factors to initiate RNA polymerase II-dependent transcription of mRNAs and other small nuclear RNAs (Grob et al. 2006; Liu et al. 2007; Patikoglou et al. 1999). Expansion of the conserved CAG repeat in humans gives rise to spinocerebellar ataxia type 17 (SCA17) (Nakamura et al. 2001), a form of autosomal dominant cerebellar ataxia involving mainly the cerebral cortex, striatum, and cerebellum (reviewed in (Orr and Zoghbi 2007; Stevanin and Brice 2006)). The Figure illustrates the increase in length of the conserved polyQ run in those species with the most recent evolutionary origin, particularly human. This increase in length has mostly been caused by an expansion of clustered CAG repeats; by contrast, clustered CAA

repeats have remained rather constant in number (1-3) over evolutionary time. In addition, whereas the amino acid sequence preceding the conserved polyQ run has also been highly conserved, the amino acid composition immediately after the conserved polyQ run has undergone substantial remodeling, particularly in those species with the most recent evolutionary origin, in which it has acquired an increasing number of small (A and V) and nucleophilic (S and T) amino acid residues. These are then followed by highly conserved residues.

*Panel B*, alignment of the protein sequence flanking an evolutionarily conserved polyQ amino acid run (*boxed*) in the *MEF2A* gene encoding the MADS box transcription enhancer factor 2, polypeptide A (myocyte enhancer factor 2A). This analysis was performed for the 9 genomes used in the present study. The MEF2A transcription factor binds specifically to A+T-rich promoter regions to activate transcription in muscle-specific genes and supports myogenic development (Huang et al. 2000; Kaushal et al. 1994; Santelli and Richmond 2000). The evolutionary comparison reveals a lengthening of the polyQ run due to the expansion of a CAG repeat in species with the most recent evolutionary origin, and increased complexity in the downstream amino acids, which are rich in Q and P residues. Remarkably, the CAG repeat has maintained the purity of its sequence composition in these genomes.

*Panel C*, alignment of the protein sequence flanking an evolutionarily conserved polyG amino acid run (*boxed*) in the *POU4F2* gene encoding POU domain class 4 transcription factor 2, followed by the codons encoding the boxed polyG run. *POU4F2* plays a key role in retinal ganglion cell development and is essential for the establishment of the visual system (Mao et al. 2008; Mu et al. 2008). The evolutionary



comparison of the *POU4F2* gene was complicated by a) a high degree of homology with the *POU4F1* gene of higher vertebrates and b) some uncertainty with respect to the evolutionary assembly of the extant *POU4F2* gene from sequences originally present in fish (fugu and zebrafish). In the chicken genome, two head-to-head DNA sequences shared homology with *POU4F1* and *POU4F2*; it remains unclear whether or not these sequences represent functional genes. This notwithstanding, a polyG run has formed upstream of a highly conserved protein-coding region; this is encoded by triplets manifesting an increasingly pure sequence composition (GGC)<sub>n</sub> in those species whose evolutionary origin has been the most recent. This polyG run was followed by another repetitive region encoding an evolutionarily stable polyS run and a less stable polyG run. *Boxed amino acids*, evolutionarily conserved amino acids encoded by a tract of at least 10 identical triNRs in the human reference genome sequence; *underlined*, putative tandem duplication events; *yellow highlight*, ≥4 GGC triNRs; *lower case codons*, S and A amino acid interruptions.

- (1) Poly(Q)-flanking region from contig11766:12,572-17,580.
- (2) Alignment of NM\_003194 with scaffold\_200:1168122-1175114.
- (3) The dinucleotide repeat interruption is not confirmed (Tomiuk et al. 2007).
- (4) Alternative symbols: LOC309957, BC081907, NM\_001014035, GeneID 309957.
- (5) A region comprising two head-to-head segments is present in the chicken genome; these segments are orthologous to the human *POU4F1* and *POU4F2* genes.

The sequences of the triNRs were extracted from within the coordinates of following genomic regions. For the *TBP* gene: human hg18\_dna range=chr6:170712710-170713273, chimpanzee panTro2\_dna range=chr6:173817673-173817863, orangutan ponAbe2\_dna range=chr6:174151433-174151619, rhesus, rheMac2\_dna range=chr4:167567051-167567246, marmoset calJac1\_dna range=Contig3625:32411-32622, mouse mm9\_dna range=chr17:15641277-15641470, rat rn4\_dna range=chr1:54394899-54395066, cat felCat3\_dna range=scaffold\_190627:97870-98147, dog canFam2\_dna range=chr12:75482612-75482777, horse equCab1\_dna range=chr31:301795-302042, cow bosTau4\_dna range=chrUn.004.695:51682-51840, opossum monDom4\_dna range=chr2:456789002-456789173, platypus ornAna1\_dna range=Contig11766:13583-13767, chicken galGal3\_dna range=chr3:42600469-42600630, lizard anoCar1\_dna range=scaffold\_200:1172491-1172684, Xenopus xenTro2\_dna range=scaffold\_2:6444646-6444815, zebrafish danRer5\_dna range=chr13:24710556-24710700, Tetraodon tetNig1\_dna range=chr5:3611822-3612063, Fugu fr2\_dna

range=chrUn:220346369-220346509, stickleback gasAcu1\_dna range=chrII:13612758-13613012, medaka oryLat1\_dna range=chr3:23352378-23352535. For the *MEF2A* gene: human hg18\_dna range=chr15:98070204-98070356, chimpanzee panTro2\_dna range=chr15:97711656-97711868, mouse mm9\_dna range=chr7:74379877-74380130, rat DQ323505, dog canFam2\_dna range=chr3:43872920-43873088, cow bosTau4\_dna range=chr21:5609565-5609806, chicken galGal3\_dna range=chr10:19145497-19145729, zebrafish danRer5\_dna range=chr18:10777361-10777582, Fugu fr2\_dna range=chrUn:260827696-260827918. For the *MEF2A* gene: human hg18\_dna range=chr15:98070204-98070356, chimpanzee panTro2\_dna range=chr15:97711656-97711868, mouse mm9\_dna range=chr7:74379877-74380130, rat DQ323505, dog canFam2\_dna range=chr3:43872920-43873088, cow bosTau4\_dna range=chr21:5609565-5609806, chicken galGal3\_dna range=chr10:19145497-19145729, zebrafish danRer5\_dna range=chr18:10777361-10777582 and Fugu fr2\_dna range=chrUn:260827696-260827918. For the *POU4F2* gene: human hg18\_dna range=chr4:147779810-147780039, chimpanzee panTro2\_dna range=chr4:150682649-150682913, orangutan ponAbe2\_dna range=chr4:152217445-152217642, rhesus rheMac2\_dna range=chr5:138768372-138768549, marmoset calJac1\_dna range=Contig6718:72680-72845, mouse mm9\_dna range=chr8:80959962-80960260, rat rn4\_dna range=chr19:31389235-31389481, cat GeneScaffold\_2960:480810:482352:1, dog canFam2\_dna range=chr15:48044665-48044914, horse equCab1\_dna range=chr2:71678521-71678703, cow bosTau4\_dna range=chr17:12580455-12580732, opossum monDom4\_dna range=chr5:132326737-132327090, platypus ornAna1\_dna range=Ultra44:795734-795949.

**Supplementary Fig. 8.** Length-distributions of the longest tetraNR and triNR sequences in the human genome. *Panel A*, tetraNRs; *Panel B*, triNRs. The x-axis shows the tract lengths expressed in terms of the numbers of repeat units whereas the y-axis shows the total number of tracts. Only those sequences that displayed the longest length distributions are shown.

**Supplementary Fig. 9.** TetraNR distributions in nine vertebrate genomes. *Left*, schematic timescale for vertebrate evolution (adapted from (Matsuya et al. 2008)). *Right*, tetraNR distributions for the 10 longest repeat sequences in each species. Note that the types of sequences may not be identical in all species.

## Supplementary Table Legends

**Supplementary Table 1.** Association of triNRs and tetraNRs with inherited human disease/traits. Representative list of studies reporting the association of polymorphic alleles with phenotypic traits and/or pathologic conditions and expanded triNRs or tetraNRs in neurological disorders.

**Supplementary Table 2.** Elevated microsatellite alterations at selected tetranucleotides (EMAST) in human cancer. List of studies reporting the % of microsatellite instability (MSI%) in human cancers. *Author's marker*, microsatellite designation given by the authors; *UCSC marker (hg18)*, microsatellite designation as given by the UCSC Human Genome Assembly hg18 browser at (<http://genome.ucsc.edu/cgi-bin/hgGateway>)

**Supplementary Table 3.** Enrichment analysis of human genes containing micro/minisatellites tracts in cDNAs. All annotated human cDNAs satisfying the conditions described in the legend to Supplementary Fig. 6 were analyzed. The genes were further classified according to the micro/minisatellite location in the 5'UTR, ORF and 3'UTR. Four gene lists were drawn up, one for the composite number of genes and three for the classified locations. Each gene list was uploaded into the DAVID (<http://david.abcc.ncifcrf.gov>) database to conduct a gene enrichment analysis. This was performed by interrogating the four test gene lists against the Gene Ontology Biological Process (GOBP), Gene Ontology Cellular Compartment (GOCC), Gene

Ontology Molecular Function (GOMF), cell signaling pathways (KEGG Pathway) and the Swiss-Prot/Protein Informatics Resource (SP-PIR) databases. Only the most enriched terms are displayed.

**Supplementary Table 4.** Gene classes enriched in triNR- and tetraNR-containing genes associated with human genetic disease/phenotypic traits. The list of non-redundant genes from Supplementary Table 1 was used to conduct a gene enrichment analysis, as described in the legend to Supplementary Table 3.

## Supplementary References

- Bacolla, A., Pradhan, S., Larson, J.E., Roberts, R.J., and Wells, R.D. 2001. Recombinant human DNA (cytosine-5) methyltransferase. III. Allosteric control, reaction order, and influence of plasmid topology and triplet repeat length on methylation of the fragile X CGG.CCG sequence. *J. Biol. Chem.* **276**: 18605-18613.
- Burge, S., Parkinson, G.N., Hazel, P., Todd, A.K., and Neidle, S. 2006. Quadruplex DNA: sequence, topology and structure. *Nucleic Acids Res.* **34**: 5402-5415.
- Elango, N., Kim, S.H., Vigoda, E., and Yi, S.V. 2008. Mutations of different molecular origins exhibit contrasting patterns of regional substitution rate variation. *PLOS Comput. Biol.* **4**: e1000015.
- Frederico, L.A., Kunkel, T.A., and Shaw, B.R. 1993. Cytosine deamination in mismatched base pairs. *Biochemistry* **32**: 6523-6530.
- Grob, P., Cruse, M.J., Inouye, C., Peris, M., Penczek, P.A., Tjian, R., and Nogales, E. 2006. Cryo-electron microscopy studies of human TFIIID: conformational breathing in the integration of gene regulatory cues. *Structure* **14**: 511-520.
- Gueron, M. and Leroy, J.L. 2000. The i-motif in nucleic acids. *Curr. Opin. Struct. Biol.* **10**: 326-331.
- Hardin, C.C., Perry, A.G., and White, K. 2001. Thermodynamic and kinetic characterization of the dissociation and assembly of quadruplex nucleic acids. *Biopolymers* **56**: 147-194.

- Hardin, C.C., Watson, T., Corregan, M., and Bailey, C. 1992. Cation-dependent transition between the quadruplex and Watson-Crick hairpin forms of d(CGCG<sub>3</sub>GCG). *Biochemistry* **31**: 833-841.
- Hillen, W., Goodman, T.C., and Wells, R.D. 1981. Salt dependence and thermodynamic interpretation of the thermal denaturation of small DNA restriction fragments. *Nucleic Acids Res.* **9**: 415-436.
- Huang, K., Louis, J.M., Donaldson, L., Lim, F.L., Sharrocks, A.D., and Clore, G.M. 2000. Solution structure of the MEF2A-DNA complex: structural basis for the modulation of DNA bending and specificity by MADS-box transcription factors. *EMBO J.* **19**: 2615-2628.
- Huertas, D. and Azorin, F. 1996. Structural polymorphism of homopurine DNA sequences. d(GGA)<sub>n</sub> and d(GGGA)<sub>n</sub> repeats form intramolecular hairpins stabilized by different base-pairing interactions. *Biochemistry* **35**: 13125-13135.
- Hutton, J.R. 1977. Renaturation kinetics and thermal stability of DNA in aqueous solutions of formamide and urea. *Nucleic Acids Res.* **4**: 3537-3555.
- Inman, R.B. 1964. Transitions of DNA homopolymers. *J. Mol. Biol.* **9**: 624-637.
- Iyer, R.R., Pluciennik, A., Rosche, W.A., Sinden, R.R., and Wells, R.D. 2000. DNA polymerase III proofreading mutants enhance the expansion and deletion of triplet repeat sequences in *Escherichia coli*. *J. Biol. Chem.* **275**: 2174-2184.
- Jaishree, T.N. and Wang, A.H. 1993. NMR studies of pH-dependent conformational polymorphism of alternating (C-T)<sub>n</sub> sequences. *Nucleic Acids Res.* **21**: 3839-3844.

- Jin, R., Gaffney, B.L., Wang, C., Jones, R.A., and Breslauer, K.J. 1992. Thermodynamics and structure of a DNA tetraplex: a spectroscopic and calorimetric study of the tetramolecular complexes of d(TG<sub>3</sub>T) and d(TG<sub>3</sub>T<sub>2</sub>G<sub>3</sub>T). *Proc. Natl. Acad. Sci. U. S. A.* **89**: 8832-8836.
- Kaushal, S., Schneider, J.W., Nadal-Ginard, B., and Mahdavi, V. 1994. Activation of the myogenic lineage by MEF2A, a factor that induces and cooperates with MyoD. *Science* **266**: 1236-1240.
- Kettani, A., Bouaziz, S., Gorin, A., Zhao, H., Jones, R.A., and Patel, D.J. 1998. Solution structure of a Na cation stabilized DNA quadruplex containing G.G.G.G and G.C.G.C tetrads formed by G-G-G-C repeats observed in adeno- associated viral DNA. *J. Mol. Biol.* **282**: 619-636.
- Krishnan-Ghosh, Y., Liu, D., and Balasubramanian, S. 2004. Formation of an interlocked quadruplex dimer by d(GGGT). *J. Am. Chem. Soc.* **126**: 11009-11016.
- Kypr, J. and Vorlickova, M. 2002. Circular dichroism spectroscopy reveals invariant conformation of guanine runs in DNA. *Biopolymers* **67**: 275-277.
- Lindahl, T. and Nyberg, B. 1974. Heat-induced deamination of cytosine residues in deoxyribonucleic acid. *Biochemistry* **13**: 3405-3410.
- Liquier, J., Geinguenaud, F., Huynh-Dinh, T., Gouyette, C., Khomyakova, E., and Taillandier, E. 2001. Parallel and antiparallel G\*G.C base triplets in pur\*pur.pyr triple helices formed with (GA) third strands. *J. Biomol. Struct. Dyn.* **19**: 527-534.
- Liu, Q.X., Nakashima-Kamimura, N., Ikeo, K., Hirose, S., and Gojobori, T. 2007. Compensatory change of interacting amino acids in the coevolution of

- transcriptional coactivator MBF1 and TATA-box-binding protein. *Mol. Biol. Evol.* **24**: 1458-1463.
- Mao, C.A., Kiyama, T., Pan, P., Furuta, Y., Hadjantonakis, A.K., and Klein, W.H. 2008. Eomesodermin, a target gene of Pou4f2, is required for retinal ganglion cell and optic nerve development in the mouse. *Development* **135**: 271-280.
- Matsuya, A., Sakate, R., Kawahara, Y., Koyanagi, K.O., Sato, Y., Fujii, Y., Yamasaki, C., Habara, T., Nakaoka, H., Todokoro, F. et al. 2008. Evola: Ortholog database of all human genes in H-InvDB with manual curation of phylogenetic trees. *Nucleic Acids Res.* **36**: D787-792.
- Mu, X., Fu, X., Beremand, P.D., Thomas, T.L., and Klein, W.H. 2008. Gene regulation logic in retinal ganglion cell development: Isl1 defines a critical branch distinct from but overlapping with Pou4f2. *Proc. Natl. Acad. Sci. U. S. A.* **105**: 6942-6947.
- Nakamura, K., Jeong, S.Y., Uchihara, T., Anno, M., Nagashima, K., Nagashima, T., Ikeda, S., Tsuji, S., and Kanazawa, I. 2001. SCA17, a novel autosomal dominant cerebellar ataxia caused by an expanded polyglutamine in TATA-binding protein. *Hum. Mol. Genet.* **10**: 1441-1448.
- Orr, H.T. and Zoghbi, H.Y. 2007. Trinucleotide repeat disorders. *Annu. Rev. Neurosci.* **30**: 575-621.
- Patikoglou, G.A., Kim, J.L., Sun, L., Yang, S.H., Kodadek, T., and Burley, S.K. 1999. TATA element recognition by the TATA box-binding protein has been conserved throughout evolution. *Genes Dev.* **13**: 3217-3230.
- Rachwal, P.A., Brown, T., and Fox, K.R. 2007a. Sequence effects of single base loops in intramolecular quadruplex DNA. *FEBS Lett.* **581**: 1657-1660.



- Rachwal, P.A., Findlow, I.S., Werner, J.M., Brown, T., and Fox, K.R. 2007b. Intramolecular DNA quadruplexes with different arrangements of short and long loops. *Nucleic Acids Res.* **35**: 4214-4222.
- Saenger, W. 1994. *Principles of nucleic acid structure*. Springer-Verlag, Berlin.
- Santelli, E. and Richmond, T.J. 2000. Crystal structure of MEF2A core bound to DNA at 1.5 Å resolution. *J. Mol. Biol.* **297**: 437-449.
- Stevanin, G. and Brice, A. 2006. Spinocerebellar ataxia 17 and Huntington's disease-like 4. In *Genetic instabilities and neurological diseases* (eds. R.D. Wells and T. Ashizawa), pp. 475-483. Elsevier/Academic Press, Amsterdam.
- Tomiuk, J., Bachmann, L., Bauer, C., Rolfs, A., Schols, L., Roos, C., Zischler, H., Schuler, M.M., Bruntner, S., Riess, O. et al. 2007. Repeat expansion in spinocerebellar ataxia type 17 alleles of the TATA-box binding protein gene: an evolutionary approach. *Eur. J. Hum. Genet.* **15**: 81-87.
- Vorlickova, M., Chladkova, J., Kejnovska, I., Fialova, M., and Kypr, J. 2005. Guanine tetraplex topology of human telomere DNA is governed by the number of (TTAGGG) repeats. *Nucleic Acids Res.* **33**: 5851-5860.
- Wells, R.D. and Larson, J.E. 1972. Buoyant density studies on natural and synthetic deoxyribonucleic acids in neutral and alkaline solutions. *J. Biol. Chem.* **247**: 3405-3409.
- Wojciechowska, M., Napierala, M., Larson, J.E., and Wells, R.D. 2006. Non-B DNA conformations formed by long repeating tracts of DM1, DM2 and FRDA genes, not the sequences per se, promote mutagenesis in flanking regions. *J. Biol. Chem.*

- Xu, Y. and Sugiyama, H. 2006. Formation of the G-quadruplex and i-motif structures in retinoblastoma susceptibility genes (Rb). *Nucleic Acids Res.* **34**: 949-954.
- Zahra, R., Blackwood, J.K., Sales, J., and Leach, D.R. 2007. Proofreading and secondary structure processing determine the orientation dependence of CAG x CTG trinucleotide repeat instability in *Escherichia coli*. *Genetics* **176**: 27-41.

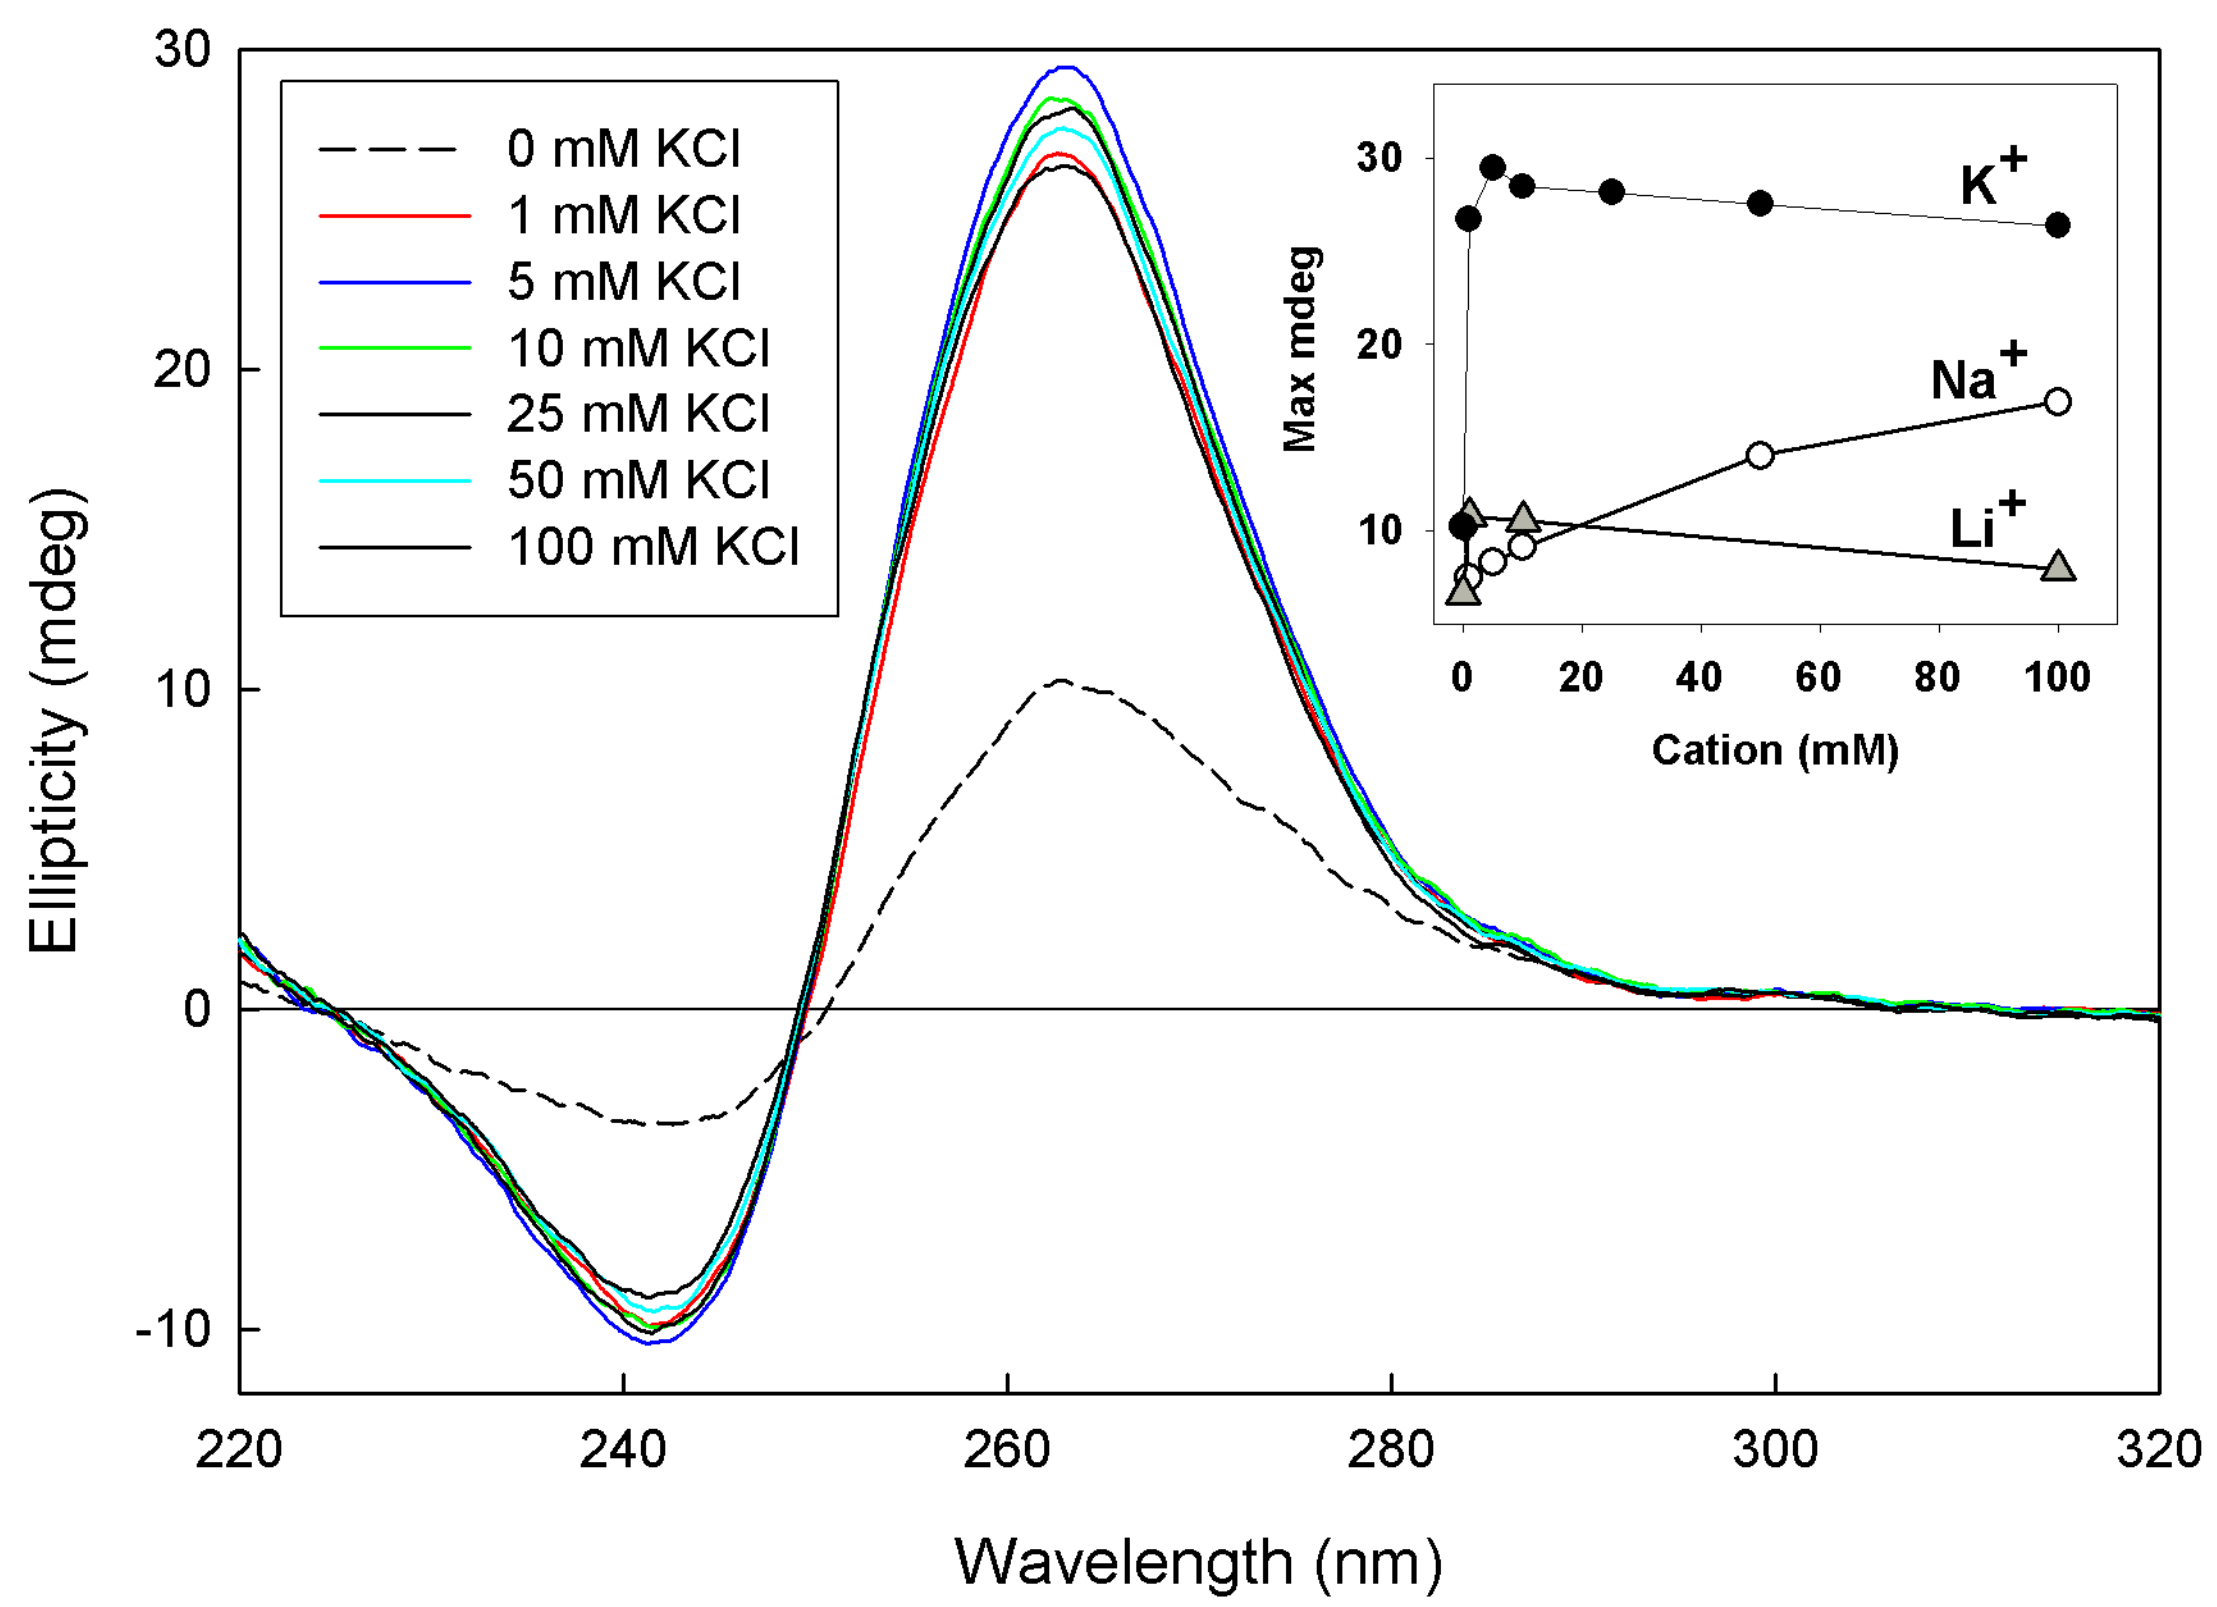

**Supplementary Fig. 1**

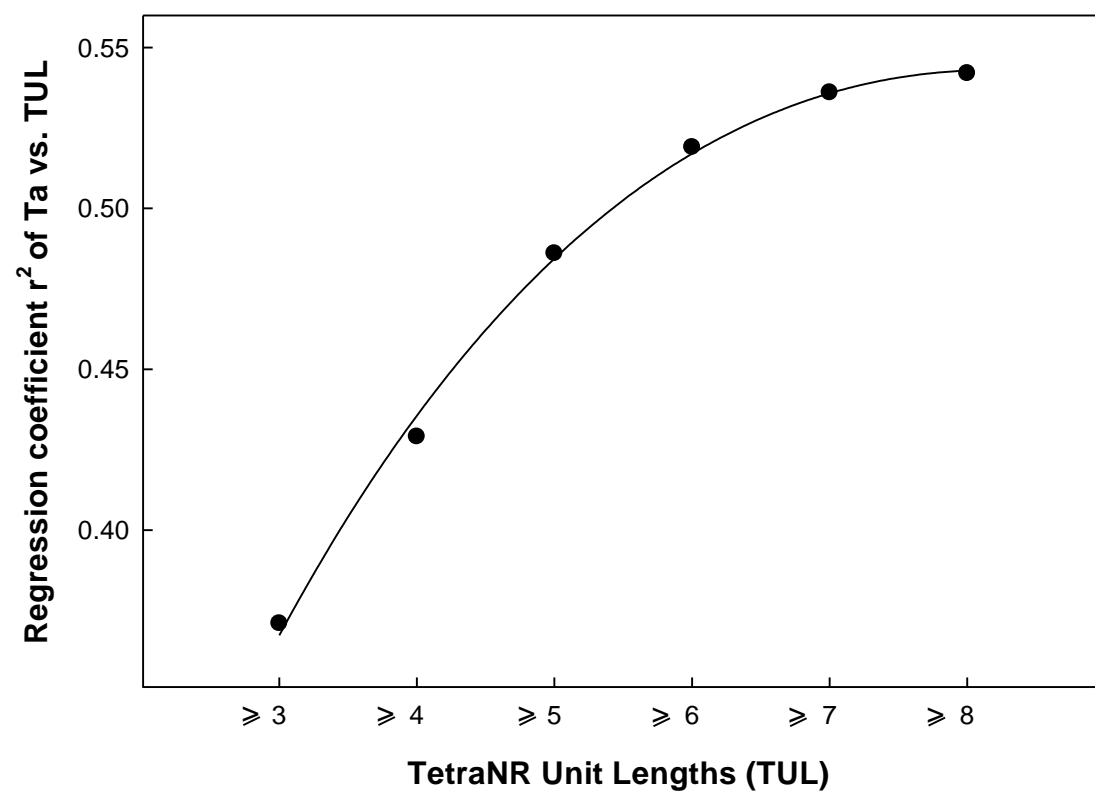

**Supplementary Fig. 2**

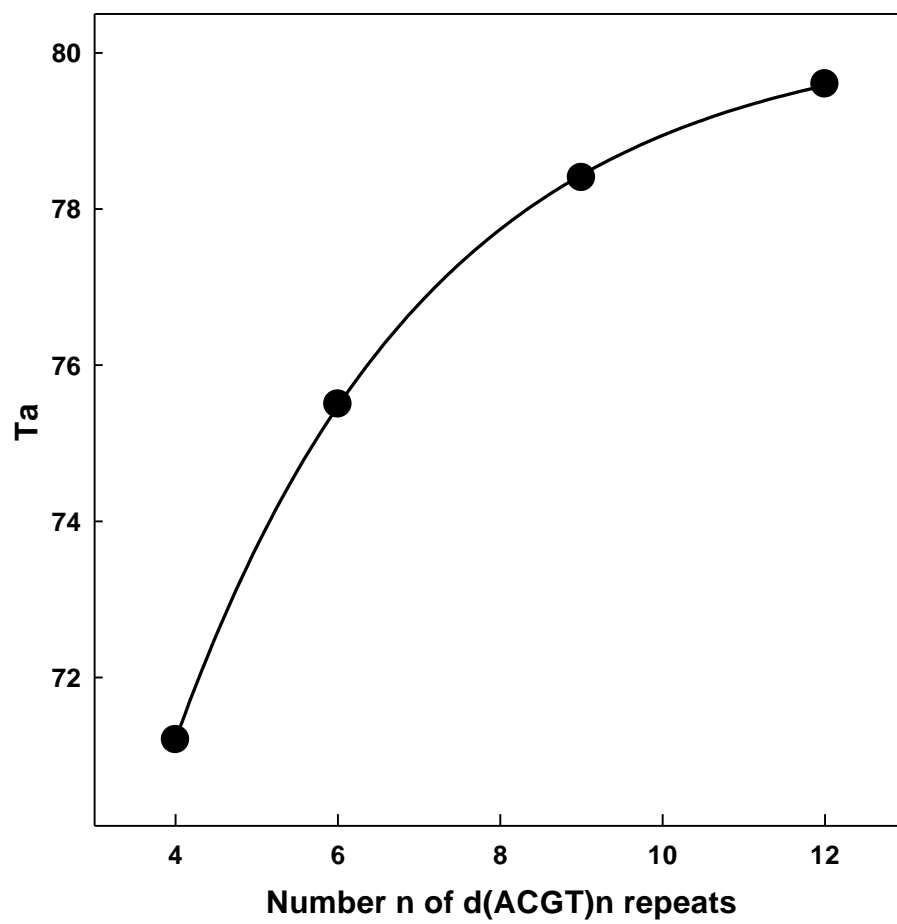

**Supplementary Fig. 3**

### A. Distribution of triNR with copy # $\geq 10$ in classified regions

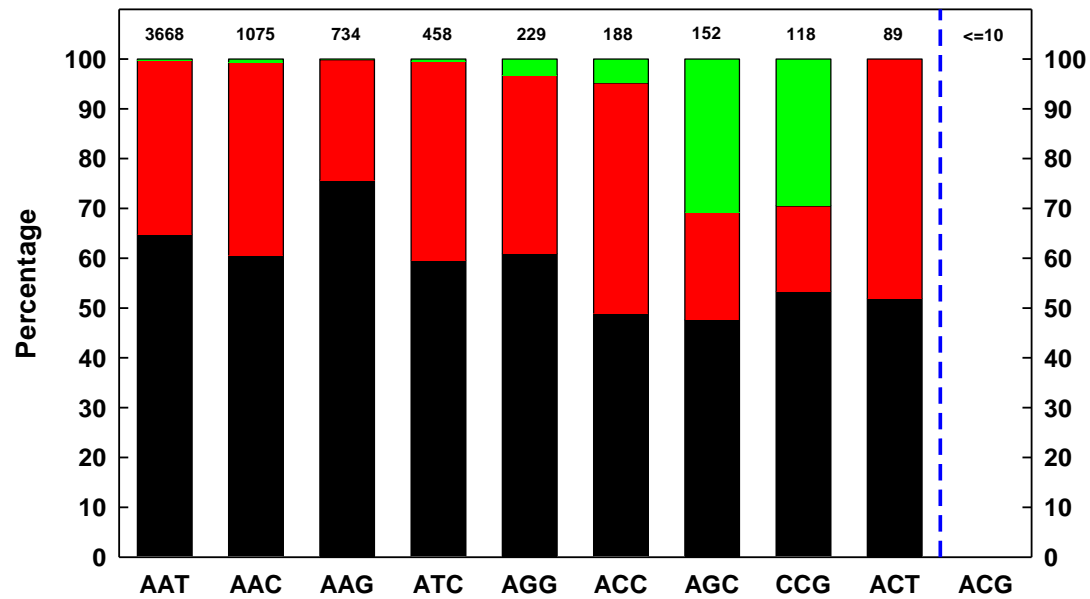

### B. Distribution of triNR with copy # $\geq 4$ in classified regions

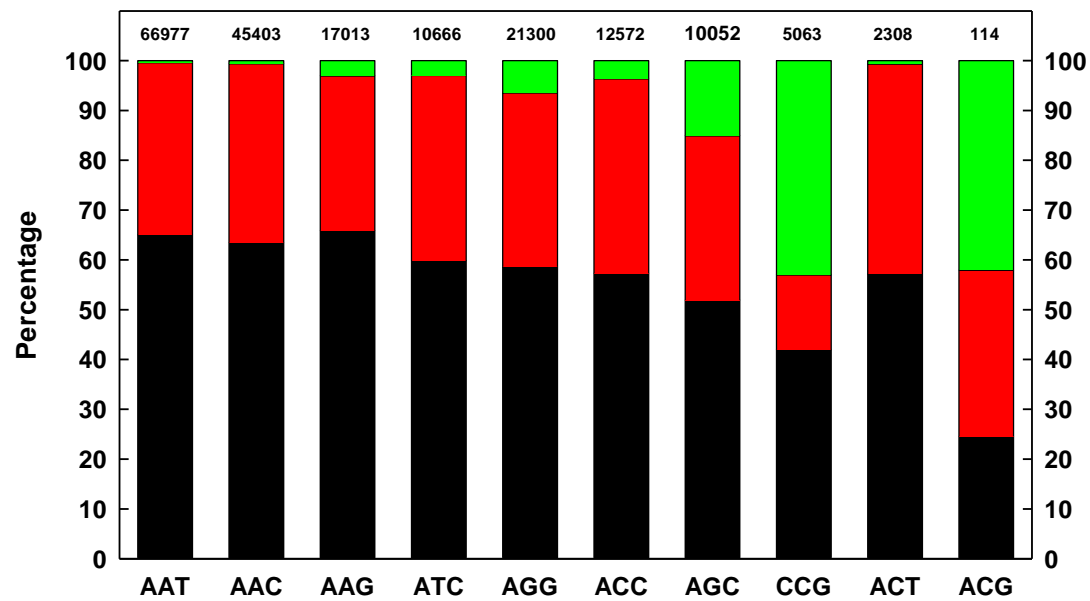

Intergenic  
 Intron  
 Exon

Supplementary Fig. 4

### A. Distribution of tetraNR with copy # $\geq 8$ in classified regions

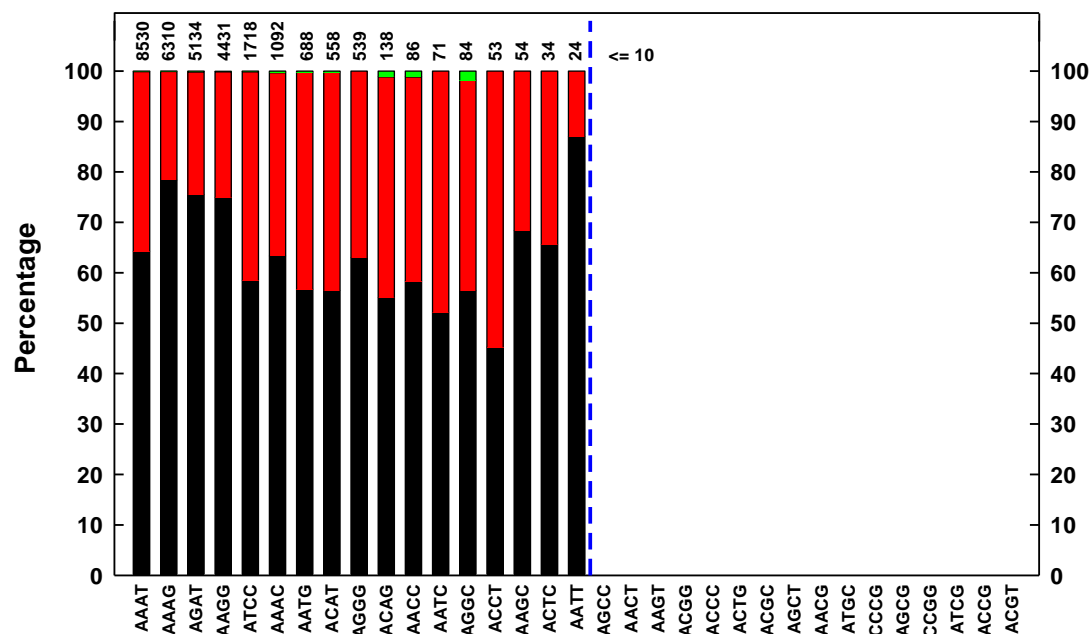

### B. Distribution of tetraNRs with copy # $\geq 3$ in classified regions

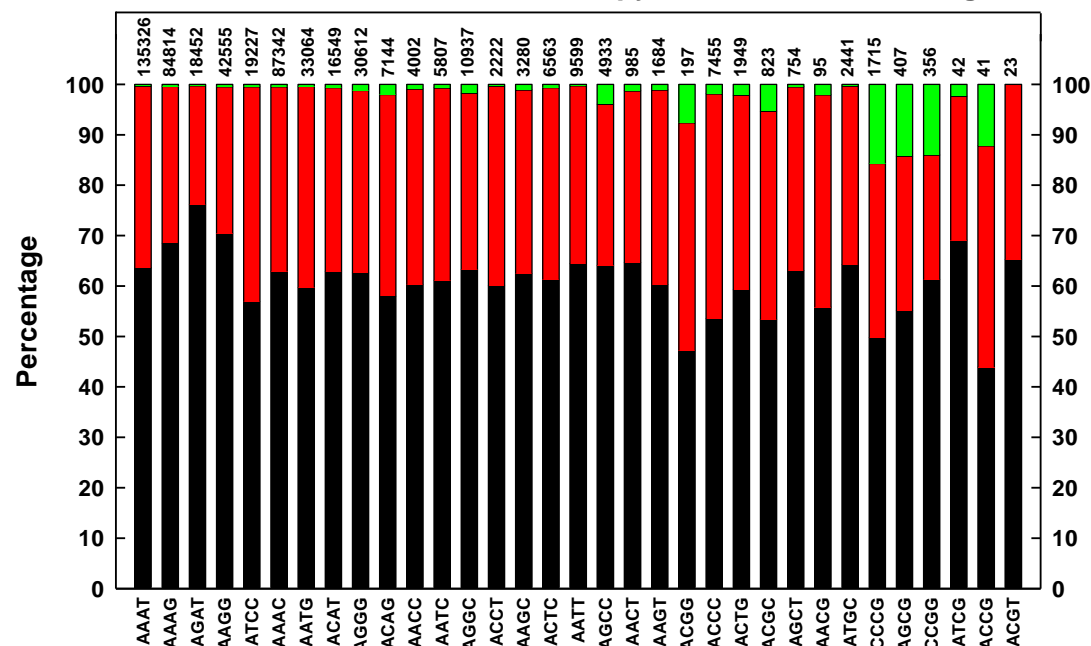

Intergenic  
 Intron  
 Exon

Supplementary Fig. 5

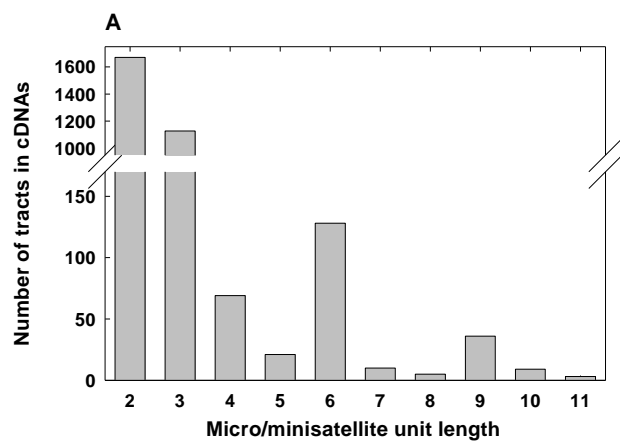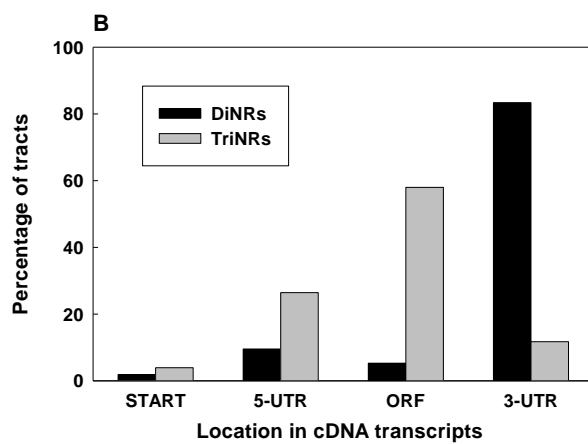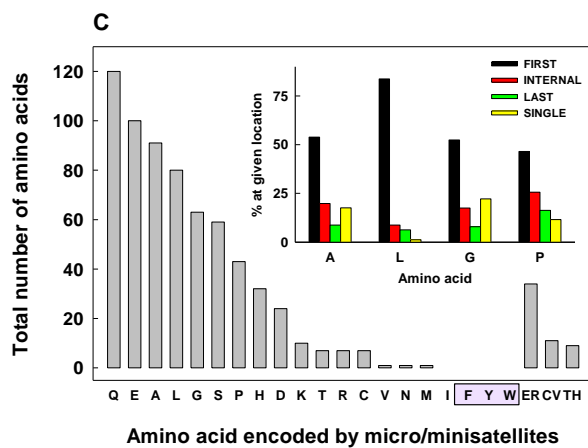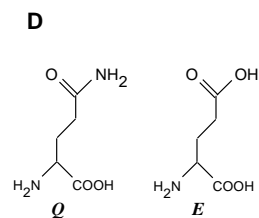

Supplementary Figure 6



# Supplementary Figure 7. Evolutionary conservation of three human coding triNR tracts containing >10 repeats in the reference human genome assembly hg18

## A. TBP gene encoding the TATA box binding protein (SCA17)

Protein sequence flanking the poly(Q) region (boxed)

|              |                     |                                      |                                        |                                       |
|--------------|---------------------|--------------------------------------|----------------------------------------|---------------------------------------|
| Human        | ENSP00000375942     | TPGIPIFSPMPYGTGLTPQPIQNTNSLSILEEQQR  | QQQQQQQQQQQQQQQQQQQQQQQQQQQQQQQQQQQQQQ | AVAAAAVQQSTSQQATQ-----GTSGQAPQ        |
| Chimpanzee   | ENSPTRP00000032146  | TPGIPIFSPMPYGTGLTPQPIQNTNSLSILEEQQR  | QQQQQQQQQQQQQQQQQQQQQQQQQQQQQQQQQQQQ   | AVAAAAVQQSTSQQATQ-----GTSGQAPQ        |
| Orangutan    | Chr6.1611.1         | TPGIPIFSPMPYGTGLTPQPIQNTNSLSILEEQQR  | QQQQQQQQQQQQQQQQQQQQQQQQQQQQQQQQQQQQ   | AVAAAAVQQSASQQATQ-----GTAGQAPQ        |
| Rhesus       | ENSMUP000000020642  | TPGIPIFSPMPYGTGLTPQPIQNTNSLSILEEQQR  | QQQQQQQQQQQQQQQQQQQQQQQQQQQQQQQQQQQQ   | AVAAAAVQQSTSQQTTQ-----GTSGQAPQ        |
| Marmoset     | Contig3625.002.a    | MPYGTGLTPQPIQNTNSLSILEEQQR           | QQQQQQQQQQQQQQQQQQQQQQQQQQQQQQQQQQQQ   | AVAAAAVQQSTSQQATSQQATQ-----GTSGQAPQ   |
| Mouse        | ENSMUSP00000014911  | TPGIPIFSPMPYGTGLTPQPIQNTNSLSILEEQQR  | QQQQQQQQQQQQQQ-----                    | AVATAAASVQQSTSQQPTQ-----GASGQTPQ      |
| Rat          | ENSRNOP00000002038  | TPGIPIFSPMPYGTGLTPQPVQNTNSLSILEEQQR  | QQQQQQQQQQQQQQQQ-----                  | AVATAAASVQQSTSQQPTQ-----GASGQTPQ      |
| Cat          | ENSFCAP00000006527  | TPGIPIFSPMPYGTGLTPQPIQNTNSLSILEEQQR  | QQQQQQQQQQQAQQQQQQQQQAQQQQQQQQ-----    | AVAAVQQSASQQATQ-----AASGQTPQ          |
| Dog          | Chr12.76.035.a      | TPGIPIFSPMPYGTGLTPQPIQNTNSLSILEEQQR  | QQQQQQQAQQQQQAQQQQQQQAQQQ-----         | AVTAVQQSTSQQATQ-----GASGQTPQ          |
| Horse        | ENSECAP00000006680  | TPGIPIFSPMPYGTGLTPQPIQNTNSLSILEEQQR  | QQQQQQQQQQQQQQQQQQQQQQQQQQQQQQ-----    | AAAAVQSTSQQATQ-----GASGQTPQ           |
| Cow          | ENSBTAP00000010109  | TPGIPIFSPMPYGTGLTPQPIQNTNSLSILEEQQR  | QQQQQQQQQQQQQQQQQQQQ-----              | AAVAAVQSTSQQATQ-----GPSGQTPQ          |
| Opossum      | Chr2.46.028.a       | TPGIPLFSPMPYGTGLTPQPVQSTSSLSILEEQQR  | QQQQQQQQQQQQ-----                      | AAQQAATQQATQ-----GTSGQTPQ             |
| Platypus (1) | ENSOANP000000020337 | TPGIPIFSPMPYGTGLTPQPVQSSNSLSILEEQRR  | QQQQQQQAQQQQQAQQQQQQQAQQQ-----         | AATAQQAPA-----GASGQTPQ                |
| Chicken      | ENSGALP00000036926  | TPGIPIFSPMPYGTGLTPQPVQSTNSLSILEEQQR  | QQQQQQ-----                            | AAQQSTSQQATQ-----GTSGQTPQ             |
| Lizard (2)   |                     | TPGIPIFSPMPYGTGLTPQPVQTNSLSILEEQQR   | QQQQ-----                              | AAQQSTSQQPTQ-----GSSGQTPQ             |
| Xenopus      | ENSXETP00000018725  | TPGINIFSPLMPYGTGLTPQPVQTNSLSILEEQQR  | QQQQ-----                              | AQQSTSQQGNQ-----GS-GQTPQ              |
| Zebrafish    | ENSDARP00000010211  | TPGLPIFSPMPYGTGLTPQPVQNSNSLSILEEQQR  | QQQQQQ-----                            | AASQQQGGMV-----GGSGQTPQ               |
| Tetraodon    | GSTENP00032802001   | TPGMPIFSMPYGSGLTPQPVQNTNSLSILEEQQR   | QQQQQQQQQQQQ-----                      | AQQAQQAGTGIPGT-----                   |
| Fugu         | ENSTRUP00000017711  | TPSMPIFSPMPYGSGLTPQPVQNTNSLSILEEQQR  | QQQQQQ-----                            | AQQANTESEIQEFYFLVCVWVENYSLGIPGTSQTTPQ |
| Stickleback  | ENSACGP00000021304  | TPGMSMFSPMPYGSGLTPQPVQNTNSLSILEEQQR  | QQQQQQ-----                            | AQQANAGIPLTRLPL-----GTSGQTPQ          |
| Medaka       | ENSORLP00000013489  | TPTMPVFSMPMPYGSGLTPQPVQNTNSLSILEEQQR | QQQQQQQQQQ-----                        | TQQLNTGLPL-----GASGQTPQ               |

Alignment of the CAG/CAA repeat tract in the boxed poly(Q)-coding region above

|                |         |         |          |            |         |            |          |     |                            |
|----------------|---------|---------|----------|------------|---------|------------|----------|-----|----------------------------|
| Human          | (CAG) 3 | (CAA) 3 | (CAG) 8  | CAA        | CAG     | CAA        | (CAG) 19 | CAA | CAG                        |
| Chimpanzee (3) | (CAG) 3 | (CAA) 3 | (CAG) 7  | CA         | ---     | ---        | (CAG) 17 | CAA | CAG                        |
| Orangutan      | (CAG) 3 | (CAA) 2 | (CAG) 8  | CAA        | CAG     | CAA        | (CAG) 8  | CAA | CAG                        |
| Rhesus         | (CAG) 3 | (CAA) 2 | (CAG) 5  | (CAA) 2    | CAG     | (CAA) 2    | (CAG) 8  | CAA | CAG                        |
| Marmoset       | (CAG) 4 | CAA     | (CAG) 14 | (CAA) 2    | (CAG) 2 | CAA        | (CAG) 3  |     |                            |
| Mouse          | (CAG) 3 | CAA     | CAG      | CAA        | (CAG) 3 | (CAA) 2    | (CAG) 2  |     |                            |
| Rat            | (CAG) 8 | CAA     | (CAG) 3  | CAA        | (CAG) 2 |            |          |     |                            |
| Cat            | (CAG) 5 | CAA     | (CAG) 2  | CAA        | CAG     | <u>gcg</u> | (CAG) 6  | CAA | (CAG) 3 <u>gct</u> (CAG) 7 |
| Dog            | ---     | CAA     | (CAG) 6  | <u>gcc</u> | (CAG) 4 | <u>gcc</u> | (CAG) 5  | CAA | (CAG) 2 <u>gcc</u> (CAG) 3 |
| Horse          | (CAG) 3 | CAA     | (CAG) 11 | CAA        | (CAG) 8 | CAA        | (CAG) 5  |     |                            |
| Cow            | (CAG) 5 | CAA     | (CAG) 13 |            |         |            |          |     |                            |
| Opossum        | (CAG) 8 | CAA     | (CAG) 2  | CAA        |         |            |          |     |                            |
| Platypus       | (CAG) 7 | (CAA) 2 | (CAG) 3  | CAA        | (CAG) 2 |            |          |     |                            |
| Chicken        | (CAG) 4 | CAA     | CAG      |            |         |            |          |     |                            |
| Lizard         | ---     | CAA     | CAG      | CAA        | CAG     |            |          |     |                            |
| Xenopus        | ---     | (CAA) 3 | CAG      |            |         |            |          |     |                            |
| Zebrafish      | ---     | (CAA) 2 | (CAG) 4  |            |         |            |          |     |                            |
| Tetraodon      | CAG     | (CAA) 2 | CAG      | (CAA) 2    | (CAG) 5 | CAA        | CAG      |     |                            |
| Fugu           | CAG     | CAA     | CAG      | (CAA) 3    |         |            |          |     |                            |
| Stickleback    | ---     | (CAA) 2 | (CAG) 2  | CAA        | CAG     |            |          |     |                            |
| Medaka         | ---     | CAA     | CAG      | (CAA) 3    | (CAG) 3 | (CAA) 2    |          |     |                            |

## B. *MEF2A* gene encoding the MADS box transcription enhancer factor 2, polypeptide A (myocyte enhancer factor 2A)

Protein sequence flanking the poly(Q) region (boxed)

|            |                    |               |             |                                                     |
|------------|--------------------|---------------|-------------|-----------------------------------------------------|
| Human      | ENSP00000284368    | PPRDRMTPSGF-- | QQQQQQQQQQ  | PPPPPPQPQPQ-PPQPQPQEQ-MGRSPVDSLSSSSSSSYDGSRDREDPRGD |
| Chimpanzee | ENSPTRP00000012805 | PPRDRMTPSGF-- | QQQQQQQ---- | PPPPPPQPQPQ-PPQPQPQEQ-MGRSPVDSLSSSSSSSYDGSRDREDPRGD |
| Mouse      | ENSMUSP00000072281 | PPRDRMTPSGF-- | QQQQQQQ---- | PQQQPPPPQ---PPQPQPQEQ-MGRSPVDSLSSSSSSSYDGSRDREDPRGD |
| Rat        | DQ323505 (4)       | PPRDRMTPSGF-- | QQQQQQQ---- | PQQQPPPPQPP-QPQPQPQEQ-MGRSPVDSLSSSSSSSYDGSRDREDPRGD |
| Dog        | Chr3.44.008.a      | PPRDRMTPSGF-- | QQQQQ-----  | PQQQPPPPPPPSQPPQPQEQ-MGRSPVDSLSSSSSSSYDGSRDREDPRGD  |
| Cow        | ENSBTAP00000014074 | PPRDRMTPSGF-- | QQQQQ-----  | PQPPPPPPQ---APQPQPQEQ-VGRSPVDSLSSSSSSSYDGSRDREDPRGD |
| Chicken    | ENSGALP00000033241 | PPRDRVTPSGFP- | QQQ-----    | PPQPQPQPQP-PQQPPQEQ-MGRSPVDSLSSSSSSSYDGSRDREDPRSD   |
| Zebrafish  | ENSDARP00000074652 | PPRERVTPSGFPP | QQQQ-----   | PPSGRPD-----MGRSPVDSLSSSSSSSYDGSRDREDHRPD           |
| Fugu       | ENSTRUP00000017406 | PPRERVTPSGFPP | QQ-----     | PQQGSSR-----QEVLRSPADSLSSSSSSSYDGSRDREDHRPD         |

All boxed Q residues above are encoded by CAG repeats except the first boxed Q of the mouse genome, which is encoded by a CAA repeat

## C. *POU4F2* gene encoding the POU domain class 4 transcription factor 2

Protein sequence flanking the conserved poly(G) region (boxed)

|            |                            |                              |                   |                                                       |
|------------|----------------------------|------------------------------|-------------------|-------------------------------------------------------|
| Human.     | ENSP00000281321            | PIAPSASSPSSSSNA----          | GGGGGGGGGGGGGGG-- | RSSSSSSSGSSGGGG-----SEAMRRACLTPPPSNIFGGLDESLLA        |
| Chimpanzee | ENSPTRP00000028307         | PTAPSASSPSSSSNA----          | GGGGGGGGGGGGG---- | RSSSSSSSGSSGGGG-----SEAMRRACLTPPPSNIFGGLDESLLA        |
| Orangutan  | Chr4.1034.1                | PTAPSASSPSSSSNA----          | GGGGGGGGGGGGG---- | RSSSSSSSGSSGGGG-----SEAMRRACLTPPPSNIFGGLDESLLA        |
| Rhesus     | ENSMUP00000030857          | PTAPSASSPSSSSNA----          | GGGGGGGGGGGGG---- | RNSSSSSSGSSGGGG-----SEAMRRACLTPPPSNIFGGLDESLLA        |
| Marmoset   | Contig6718.002.a           | PTAPSASSPSSSSNA----          | GGGGGGGGGGGGG---- | RSSSSSSSGSSGGGG-----SEALRRACLTPPPSNIFGGLDESLLA        |
| Mouse:     | ENSMUSP00000034115         | PAAPSASSPSSSSNA----          | GGGGGGGGGGGGGG--  | RSSSSSSSGSSGGGGGG-----SEAMRRACLTPPPSNIFGGLDESLLA      |
| Rat:       | ENSRNOP00000016422         | PAAPSASSPSSSSNA----          | GSGGGGGGGGGGGGG   | RSSSSSSSGSSGGGGGG-----SEAMRRACLTPPPSNIFGGLDESLLA      |
| Cat        | ENSFCAP00000002806         | -----SSNA----                | GGGGSGGGGGCGG---- | RSSSSSSSGSSGGGG-----SEAMRRACLTPPPSNIFGGLDESLLA        |
| Dog:       | Chr15.49.002.a             | PAAPSASSPSSSSSA----          | GGGGSGGGGGGGG---- | RSSSSSSSGSSGGGG-----SEAMRRACLTPPPSNIFGGLDESLLA        |
| Horse      | ENSECAP00000018181         | PAAPSASSPSSSSNA----          | GGGGSGGGGGGGG---- | RSSSSSSSGSSGGGG-----SEAMRRACLTPPPSNIFGGLDESLLA        |
| Cow:       | ENSBTAP00000007421         | PAAPSASSPSSSSNA----          | GGGGSGGGGGGGG---- | RSSSSSSSGSSGGGG-----SEAMRRACLTPPPSNIFGGLDESLLA        |
| Opossum    | Chr5.14.008.a              | CTSSSAAPSSSSPSSNTSS-         | GGGGGGGGG-----    | RSSNSGSSSGSSGGGGGGGGGG-----SEAMRRACLTPPPSNIFGGLDESLLA |
| Platypus   | ENSOANP00000010988         | CTSAPAAPSSSSPSSSSSP          | GGGGAGAGGAGGG---  | SAGSSSSGG-----PEAMRRACLTPPPSNIFGGLDESLLA              |
| Chicken:   | Chr13_random:8436-8657 (5) | POU4F1<                      |                   | >POU4F2<br>GNIFAGFDETLR                               |
| Zebraf.:   | AY196176                   | SLHSSSSSTLTSNAPSSSSCSSS----- |                   | RHSSTISSSGGGS-----SEAMRRACLTPPPSNIFGGLDESLLA          |
| Fugu:      | ENSTRUP00000008461         | -LHSSSSST-LTSNAPSS-CSSS----- |                   | RHSSTISSSGGGS-----SEAMRRACLTPPPSNIFGGLDESLLA          |

Highlight of (four or more consecutive) GGC repeats in the boxed poly(G)-coding region above

|            |                                                                 |
|------------|-----------------------------------------------------------------|
| Human      | GGT GGT GGC GGA GGC     |
| Chimpanzee | GGT GGC GGA GGC         |
| Orangutan  | GGT GGC GGT GGC GGC GGC GGC GGC GGC GGC GGC GGC GGA GGC         |
| Rhesus     | GGT GGC GGT GGA GGC GGC GGC GGC GGC GGC GGC GGC GGA GGC         |
| Marmoset   | GGT GGC GGC GGT GGC GGC GGC GGC GGC GGC GGC GGC GGA GGC         |
| Mouse      | GGC GGC GGC GGC GGT GGC |
| Rat        | GGC agc GGC GGC GGC GGC GGC GGC GGC GGC GGC GGT GGT GGC GGC GGC |
| Cat        | GGC GGC GGT GGT GGC agt GGC GGC GGC tgt GGC GGC                 |
| Dog        | GGC GGC GGC GGC GGC agt GGC GGC GGC GGC GGC GGC GGC GGC GGC     |
| Horse      | GGC GGC GGT GGC GGC agt GGC GGC GGC GGT GGC GGC                 |
| Cow        | GGC GGC GGC GGC GGC agt GGC GGC GGC GGT GGC GGC                 |
| Opossum    | GGG GGC GGT GGT GGC GGC agt GGC GGC                             |
| Platypus   | GGG GGC GGC GGC gca GGC gca GGC GGC gca GGC GGC GGC             |

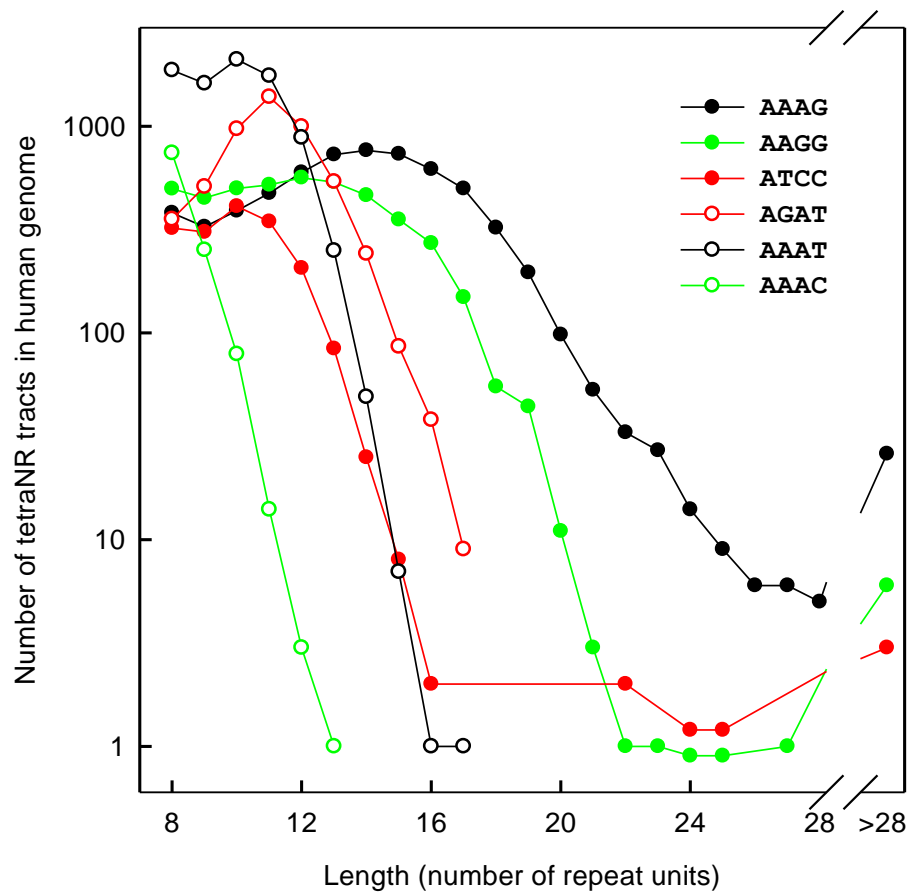

Supplementary Fig. 8A

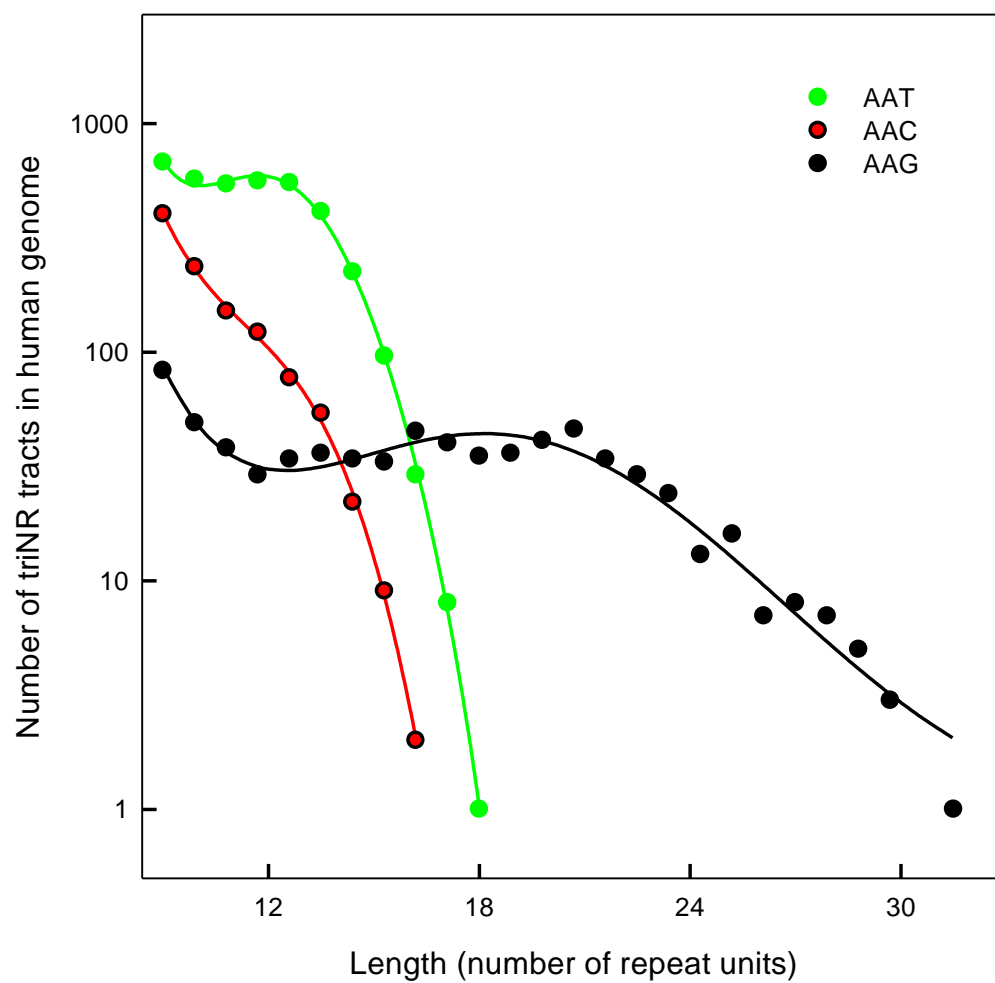

Supplementary Fig. 8B

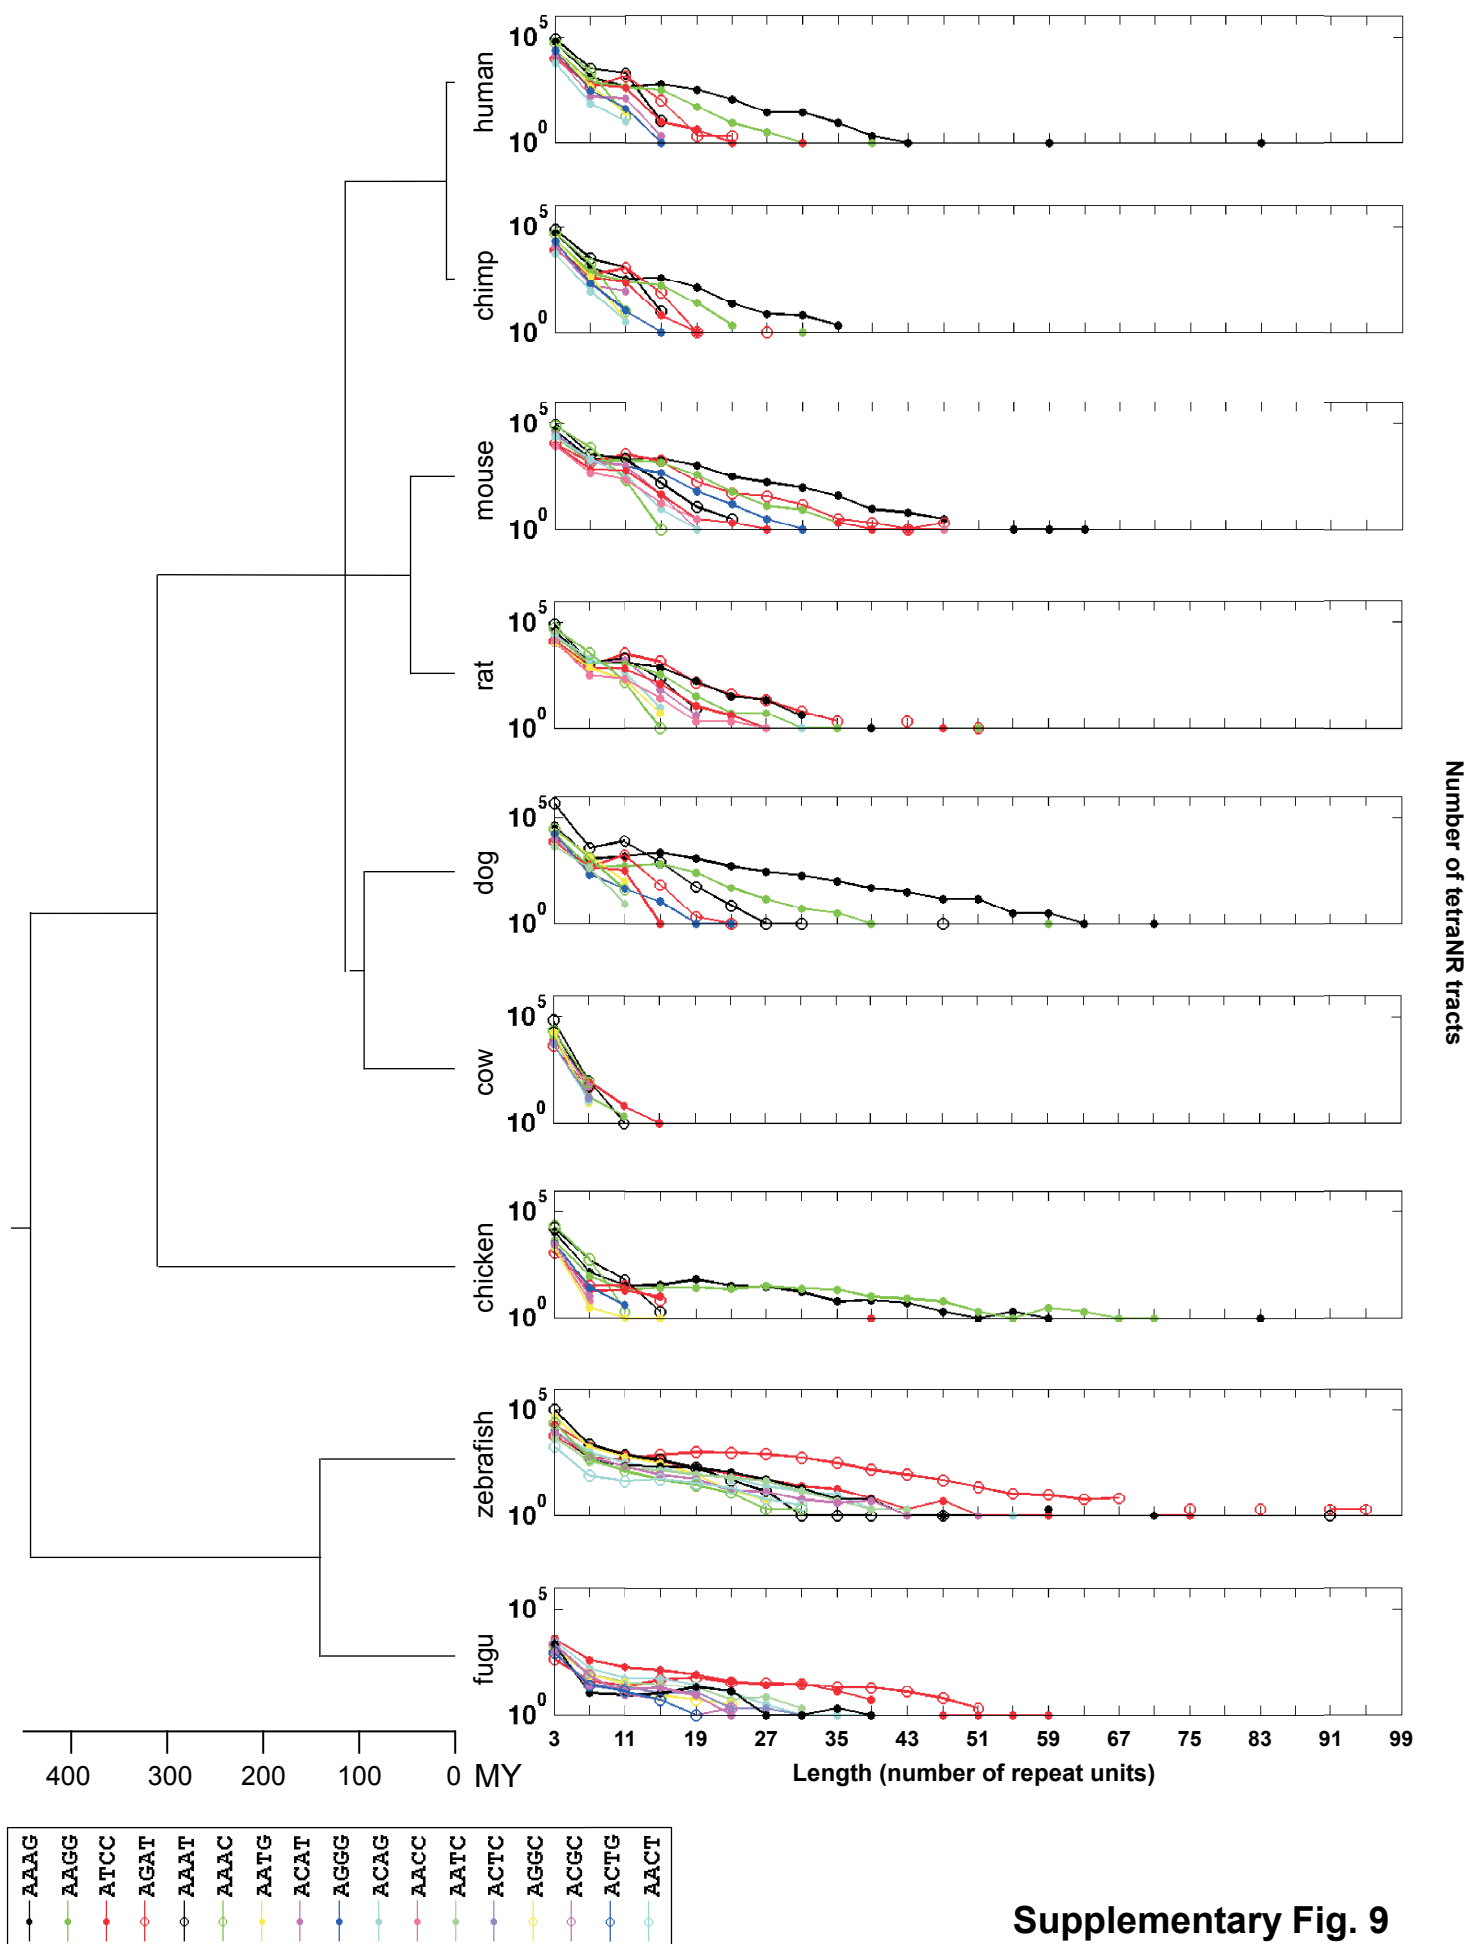

Supplementary Fig. 9

**Supplementary Table 1. Association of triNRs and tetraNRs with inherited human disease/traits**

**A. TetraNRs**

| Disease - phenotypic trait                         | Gene           | Chromosomal location | Amplet               | Normal copy length or number | Pathological copy length or number | Location   | Author             | Journal                 | Vol. | Page | Year |
|----------------------------------------------------|----------------|----------------------|----------------------|------------------------------|------------------------------------|------------|--------------------|-------------------------|------|------|------|
| Panic disorder, association                        | <i>CCK</i>     | 3p21-pter            | Mixed TRs            | 363-399 bp                   | 379-383 bp                         | 5' UTR     | Hattori            | Mol Psychiatry          | 6    | 465  | 2001 |
| Atherogenic lipoprotein phenotype                  | <i>CETP</i>    | 16q13                | GAAA/GGAA ( R-tract) | 324-400 bp                   | 404-464                            | promoter   | Talmud             | Circulation             | 101  | 2461 | 2000 |
| Myotonic dystrophy                                 | <i>CNBP</i>    | 3q21                 | CCTG                 | 104-176 bp                   | 75-11000                           | IVS1       | Liquori            | Science                 | 293  | 864  | 2001 |
| Hyperandrogeny in women, association               | <i>CYP19A1</i> | 15q21                | TTTA                 | 7-13                         | 7                                  | IVS4       | Baghaei            | Obesity Res             | 11   | 578  | 2003 |
| Obesity in women, association                      | <i>CYP19A1</i> | 15q21                | TTTA                 | 7-13                         | 7                                  | IVS4       | Baghaei            | Obesity Res             | 10   | 115  | 2002 |
| Breast cancer, increased risk association          | <i>CYP19A1</i> | 15q21                | TTTA                 | 7,8,9,11,12                  | 12                                 | IVS4       | Kristensen         | Pharmacogenetics        | 8    | 43   | 1998 |
| Prostate cancer, association                       | <i>CYP19A1</i> | 15q21                | TTTA                 | 167-191 bp                   | 171, 187 bp                        | IVS4       | Latil              | Cancer                  | 92   | 1130 | 2001 |
| Osteoporosis, association                          | <i>CYP19A1</i> | 15q21                | TTTA                 | 7-14                         | Long alleles = protective          | IVS4       | Masi               | J Clin Endocrinol Metab | 86   | 2263 | 2001 |
| Osteoporosis in late menopause, association        | <i>CYP19A1</i> | 15q21                | TTTA                 | 8,10-13                      | 7                                  | IVS4       | Riancho            | Bone                    | 36   | 917  | 2005 |
| Breast cancer, increased risk, association         | <i>CYP19A1</i> | 15q21                | TTTA                 | 6-9,11-13                    | 10                                 | IVS4       | Ribeiro            | Toxicol Lett            | 164  | 90   | 2006 |
| Breast cancer, increased risk, association         | <i>CYP19A1</i> | 15q21                | TTTA                 | 168, 175-191bp               | 171 bp                             | IVS4       | Siegelmann-Danieli | Br J Cancer             | 79   | 456  | 1999 |
| Low bone mineral density in elder men, association | <i>CYP19A1</i> | 15q21                | TTTA                 | 7-13                         | 7                                  | IVS4       | Van Pottelbergh    | J Clin Endocrinol Metab | 88   | 3075 | 2003 |
| Graves disease, susceptibility, association        | <i>GC</i>      | 4q12                 | TAAA                 | 6,8,10                       | 8                                  | IVS8       | Pani               | J Clin Endocrinol Metab | 87   | 2564 | 2002 |
| Juvenile absence epilepsy, association             | <i>GRIK1</i>   | 21q22                | AGAT                 | 7-8, 10-12                   | 9                                  | non-coding | Sander             | Am J Med Genet          | 74   | 416  | 1997 |

|                                                              |               |            |           |                                         |                  |          |            |                           |      |      |      |
|--------------------------------------------------------------|---------------|------------|-----------|-----------------------------------------|------------------|----------|------------|---------------------------|------|------|------|
| Schizophrenia, increased risk                                | <i>JARID2</i> | 6p23-p24   | TGAA      | 11-13                                   | 8,10             | 3' end   | Pedrosa    | Am J Med Genet B          | 144B | 45   | 2007 |
| Obesity, association                                         | <i>LEP</i>    | 7q31       | TTTC      | Allele I - short                        | Allele II - long | 3' UTR   | McGarvey   | Int J Obes                | 26   | 783  | 2002 |
| Preeclampsia, increased risk                                 | <i>LEP</i>    | 7q31       | TTTC      | Alleles I/I II/II<br>I=short, II = long | Alleles I/II     | 3' UTR   | Muy-Rivera | Physiol Res               | 54   | 167  | 2005 |
| Hypertension, association                                    | <i>LEP</i>    | 7q31       | TTTC      | Allele II - long                        | Allele I - short | 3' UTR   | Shintani   | J Clin Endocrinol Metab   | 87   | 2909 | 2002 |
| Inflammatory polyarthritis, susceptibility                   | <i>MIF</i>    | 22q11      | CATT      | 5-6                                     | 7                | promoter | Barton     | Genes Immun               | 4    | 487  | 2003 |
| Severity of rheumatoid arthritis, association                | <i>MIF</i>    | 22q11      | CATT      | 5                                       | 6-8              | promoter | Baugh      | Genes Immun               | 3    | 170  | 2002 |
| Celiac disease, susceptibility                               | <i>MIF</i>    | 22q11      | CATT      | 5-6                                     | 7 (8 is rare)    | promoter | Nunez      | Genes Immun               | 8    | 168  | 2007 |
| Infection in cystic fibrosis, susceptibility                 | <i>MIF</i>    | 22q11      | CAAT      | 5                                       | 6-8              | promoter | Plant      | Am J Respir Crit Care Med | 172  | 1412 | 2005 |
| Obesity, increased risk                                      | <i>MIF</i>    | 22q11      | CATT      | 5                                       | 6-8              | promoter | Sakaue     | Int J Obes                | 30   | 238  | 2006 |
| Obsessive-compulsive disorder, association                   | <i>MOG</i>    | 6p21.3-p22 | Mixed TRs | Alleles 1, 3-7                          | Allele 2         | 3' UTR   | Zai        | Am J Med Genet            | 129B | 64   | 2004 |
| Recurrent early onset major depressive disorder, association | <i>None</i>   |            | CTAT      | 96-120,128 bp                           | 124 bp           |          | Philibert  | Am J Med Genet            | 121B | 39   | 2003 |
| Increased height, association                                | <i>PTHR1</i>  | 3p21-p22   | AAAG      | 3,5-8                                   | 6                | promoter | Minagawa   | J Clin Endocrinol Metab   | 87   | 1791 | 2002 |
| Increased height, association                                | <i>PTHR1</i>  | 3p21-p22   | AAAG      | 2,5-9                                   | 6                | promoter | Scillitani | Hum Genet                 | 119  | 416  | 2006 |
| Diabetes, type 2, association                                | <i>TCF7L2</i> | 10q25      | CTTT      | 6                                       | 5, 7-11          | IVS3     | Grant      | Nat Genet                 | 38   | 320  | 2006 |
| Diabetes, type 2, association                                | <i>TCF7L2</i> | 10q25      | CTTT      |                                         |                  | IVS3     | Hayashi    | Diabetologica             | 50   | 980  | 2007 |
| Personality traits                                           | <i>TFAP2B</i> | 6p12       | CAAA      | 4-5                                     | 4-5              | IVS2     | Damberg    | Mol Psychiatry            | 5    | 220  | 2000 |
| Functional study                                             | <i>TH</i>     | 11p15      | TCAT      | 5-10                                    |                  | IVS1     | Albanese   | Hum Mol Genet             | 10   | 1785 | 2001 |
| Tobacco dependence, protection, association                  | <i>TH</i>     | 11p15      | TCAT      | 6-10                                    | 7 (protective)   | IVS1     | Anney      | Pharmacogenetics          | 14   | 73   | 2004 |
| Schizophrenia, susceptibility                                | <i>TH</i>     | 11p15      | TCAT      | 6-10                                    | 7                | IVS1     | Jacewicz   | Forensic Sci Int          | 162  | 24   | 2006 |
| Tobacco dependence, protection, association                  | <i>TH</i>     | 11p15      | TCAT      | 6-10                                    | 7 (protective)   | IVS1     | Olsson     | Behav Genet               | 34   | 85   | 2004 |

|                                                                      |                |       |                            |                |  |          |         |                      |      |      |      |
|----------------------------------------------------------------------|----------------|-------|----------------------------|----------------|--|----------|---------|----------------------|------|------|------|
| Physiology of catecholamine secretion, blood pressure and heart rate | <i>TH</i>      | 11p15 | TCAT                       | 5-10           |  | IVS1     | Zhang   | Physiol Genomics     | 19   | 277  | 2004 |
| Functional Study                                                     | <i>TNFRSF8</i> | 1p36  | ATCC                       | 4, 11          |  | promoter | Croager | Am J Pathol          | 156  | 1723 | 2000 |
| Hodgkin's lymphoma - anaplastic large cell lymphoma                  | <i>TNFRSF8</i> | 1p36  | ATCC (ACCC, ATGC and GTCC) | 1050 - 1612 bp |  | promoter | Durkop  | Biochim Biophys Acta | 1519 | 185  | 2001 |

## B. TriNRs

|                                                 |              |          |     |       |        |               |          |                 |     |      |      |
|-------------------------------------------------|--------------|----------|-----|-------|--------|---------------|----------|-----------------|-----|------|------|
| Fragile site, FRAXE                             | <i>AFF2</i>  | Xq28     | CCG | 4-39  | >200   | 5' UTR        | Knight   | Cell            | 74  | 127  | 1993 |
| Spino-bulbar muscular atrophy (Kennedy disease) | <i>AR</i>    | Xq12     | CAG | 17-26 | 40-52  | coding region | LaSpada  | Nature          | 352 | 77   | 1991 |
| Androgen insensitivity syndrome                 | <i>AR</i>    | Xq12     | CAG | 17-26 | 8      | coding region | Kooy     | Am J Med Genet  | 85  | 209  | 1999 |
| Prostate cancer, increased risk, association    | <i>AR</i>    | Xq12     | CAG | 9-29  | <22    | exon 1        | Stanford | Cancer Res      | 57  | 1194 | 1997 |
| Prostate cancer, increased risk, association    | <i>AR</i>    | Xq12     | GGN | 8-17  | ≤16    | exon 1        | Stanford | Cancer Res      | 57  | 1194 | 1997 |
| Mental retardation and epilepsy                 | <i>ARX</i>   | Xp21.3   | GCG | 10    | 17     | exon 2        | Stromme  | Nat Genet       | 30  | 441  | 2002 |
| Central hypoventilation syndrome ?              | <i>ASCL1</i> | 12q23.2  | CAG | 14    | 15, 17 | coding region | Sasaki   | Hum Genet       | 114 | 22   | 2003 |
| Osteoarthritis, susceptibility, association     | <i>ASPN</i>  | 9q22.31  | GAY | 13    | 14     | coding region | Kizawa   | Nat Genet       | 37  | 138  | 2005 |
| Dentatorubro-pallidoluysian atrophy (Haw river) | <i>ATN1</i>  | 12p13.31 | CAG | 3-36  | 48-93  | coding region | Brusco   | Arch Neurol     | 61  | 727  | 2004 |
| Dentatorubro-pallidoluysian atrophy (Haw river) | <i>ATN1</i>  | 12p13.31 | CAG | 9-23  | 40-100 | coding region | Koide    | Nat Genet       | 6   | 9    | 1994 |
| Schizophrenia, association                      | <i>ATXN1</i> | 6p22.3   | CAG | 25-36 | 31     | coding region | Joo      | Psychiatr Genet | 9   | 7    | 1999 |
| Spinocerebellar ataxia 1                        | <i>ATXN1</i> | 6p22.3   | CAG | 25-36 | 40-100 | coding region | Orr      | Nat Genet       | 4   | 221  | 1993 |
| Spinocerebellar ataxia 1                        | <i>ATXN1</i> | 6p22.3   | CAG | 6-44  | 37-91  | coding region | Brusco   | Arch Neurol     | 61  | 727  | 2004 |



|                                                 |                |          |     |       |           |               |               |                                       |      |      |      |
|-------------------------------------------------|----------------|----------|-----|-------|-----------|---------------|---------------|---------------------------------------|------|------|------|
| Spinocerebellar ataxia 2                        | <i>ATXN2</i>   | 12q24.12 | CAG | 14-31 | 32-500    | coding region | Brusco        | Arch Neurol                           | 61   | 727  | 2004 |
| Multiple sclerosis, susceptibility, association | <i>ATXN2</i>   | 12q24.12 | CAG | 15-29 | 22        | coding region | Chataway      | Neurogenetics                         | 2    | 91   | 1999 |
| Spinocerebellar ataxia 2                        | <i>ATXN2</i>   | 12q24.12 | CAG | 15-29 | 35-59     | coding region | Sanpei        | Nat Genet                             | 14   | 277  | 1996 |
| Machado-Joseph disease                          | <i>ATXN3</i>   | 14q32.12 | CAG | 12-44 | 45        | coding region | Padiath       | Am J Med Genet                        | 133B | 124  | 2005 |
| Machado-Joseph disease                          | <i>ATXN3</i>   | 14q32.12 | CAG | 13-36 | 68-79     | coding region | Kawaguchi     | Nat Genet                             | 8    | 221  | 1994 |
| Machado-Joseph disease                          | <i>ATXN3</i>   | 14q32.12 | CAG | 13-47 | 53-86     | coding region | Brusco        | Arch Neurol                           | 61   | 727  | 2004 |
| Spinocerebellar ataxia 7                        | <i>ATXN7</i>   | 3p14.1   | CAG | 7-17  | 38-130    | coding region | David         | Nat Genet                             | 17   | 65   | 1997 |
| Spinocerebellar ataxia 7                        | <i>ATXN7</i>   | 3p14.1   | CAG | 7-35  | 36- >300  | coding region | Brusco        | Arch Neurol                           | 61   | 727  | 2004 |
| Spinocerebellar ataxia 8                        | <i>ATXN8OS</i> | 13q21    | CTG | 15-50 | 110-130   | 3' UTR        | Brusco        | Arch Neurol                           | 61   | 727  | 2004 |
| Spinocerebellar ataxia 8                        | <i>ATXN8OS</i> | 13q21    | CTG | 16-92 | 107-127   | 3' UTR        | Koob          | Nat Genet                             | 21   | 379  | 1999 |
| Spinocerebellar ataxia 6                        | <i>CACNA1A</i> | 19p13.13 | CAG | 4-16  | 21-28     | coding region | Zhuchenko     | Nat Genet                             | 15   | 62   | 1997 |
| Spinocerebellar ataxia 6                        | <i>CACNA1A</i> | 19p13.13 | CAG | 4-18  | 19-33     | coding region | Brusco        | Arch Neurol                           | 61   | 727  | 2004 |
| Jacobsen syndrome                               | <i>CBL</i>     | 11q23.3  | CCG | 11    | 700-800   | 5' gene       | Jones         | Nature                                | 376  | 145  | 1995 |
| Diabetic nephropathy, protection , association  | <i>CNDP1</i>   | 18q22.3  | CTG | 5-7   | 5         | exon 2        | Janssen       | Diabetes                              | 54   | 2320 | 2005 |
| Anorexia nervosa, bingeing/purging, association | <i>CNR1</i>    | 6q15     | AAT | 12-20 | 14        | ?             | Siegfried     | Am J Med Genet B Neuropsychiatr Genet | 125B | 126  | 2004 |
| IV drug dependence, susceptibility, association | <i>CNR1</i>    | 6q15     | AAT | 12-20 | 16-20     | ?             | Comings       | Mol Psychiatry                        | 2    | 161  | 1997 |
| Mental retardation                              | <i>DIP2B</i>   | 12q13.13 | CGG | 6-23  | 250-285   | promoter      | Winnepeninckx | Am J Hum Genet                        | 80   | 221  | 2007 |
| Myotonic dystrophy, increased risk, association | <i>DMPK</i>    | 19q13.32 | CTG | 5-37  | >19       | 3' UTR        | Gennarelli    | Hum Genet                             | 105  | 165  | 1999 |
| Myotonic dystrophy                              | <i>DMPK</i>    | 19q13.32 | CTG | <30   | 50- >2000 | 3' UTR        | Brook         | Cell                                  | 68   | 799  | 1992 |
| Increased transcription, association            | <i>FMR1</i>    | Xq27.3   | CGG | 5-40  | 41-60     | 5' UTR        | Loesch        | J Med Genet                           | 44   | 200  | 2007 |

|                                                          |               |                 |     |                      |         |               |                   |                                       |     |       |      |
|----------------------------------------------------------|---------------|-----------------|-----|----------------------|---------|---------------|-------------------|---------------------------------------|-----|-------|------|
| Fragile X mental retardation syndrome                    | <i>FMR1</i>   | Xq27.3          | CGG | 5-52 and 60-200 (pm) | >200    | 5' UTR        | Fu                | Cell                                  | 67  | 1047  | 1991 |
| Premature ovarian failure, association with              | <i>FMR1</i>   | Xq27.3          | CGG | <55                  | 55-200  | 5' UTR        | Allingham-Hawkins | Am J Med Genet                        | 83  | 322   | 1999 |
| Congen. anom. of kidney and urinary tract (CAKUT)?       | <i>FOXC1</i>  | 6p25.3          | GGC | 6                    | 7       | coding region | Nakano            | Tokai J Exp Clin Med                  | 28  | 121   | 2003 |
| Fragile site, FRA10A                                     | <i>FRA10A</i> | 10q23.33        | CGG | 8-13                 | >200    | 5' UTR        | Sarafidou         | Genomics                              | 84  | 69    | 2004 |
| Friedreich ataxia                                        | <i>FXN</i>    | 9q21.11         | GAA | 7-20                 | 200-900 | IVS1          | Campuzano         | Science                               | 271 | 1423  | 1996 |
| Schizophrenia, association                               | <i>GCLC</i>   | 6p12.1          | GAG | 7, 9                 | 8       | 5' UTR        | Gysin             | Proc Natl Acad Sci USA                | 104 | 16621 | 2007 |
| Warfarin sensitivity, association                        | <i>GGCX</i>   | 2p11.2          | CAA | 10                   | 11, 13  | IVS6          | Shikata           | Blood                                 | 103 | 2630  | 2004 |
| Cancer susceptibility, association                       | <i>GSPT1</i>  | 16p13.13        | GGN | 8-12                 | 12      | exon 1        | Brito             | Carcinogenesis                        | 26  | 2046  | 2005 |
| Huntington disease                                       | <i>HD</i>     | 4p16.3 - 4p16.2 | CAG | <35                  | 36-39   | coding region | Quarrell          | J Med Genet                           | 44  | e68   | 2007 |
| Huntington disease                                       | <i>HD</i>     | 4p16.3 - 4p16.2 | CAG | <35                  | 40-400  | coding region | HDCRG             | Cell                                  | 72  | 971   | 1993 |
| Hand-foot-genital syndrome                               | <i>HOXA13</i> | 7p15.2          | GCN | 14                   | 22      | coding region | Innis             | Hum Mol Genet                         | 13  | 2841  | 2004 |
| Hand-foot-genital syndrome                               | <i>HOXA13</i> | 7p15.2          | GCN | 18                   | 29      | coding region | Innis             | Hum Mol Genet                         | 13  | 2841  | 2004 |
| Hand-foot-genital syndrome                               | <i>HOXA13</i> | 7p15.2          | GCN | 18                   | 30      | coding region | Innis             | Hum Mol Genet                         | 13  | 2841  | 2004 |
| Brachydactyly-syndactyly syndrome                        | <i>HOXD13</i> | 2q31.1          | GCN | 15                   | 8       | exon 1        | Zhao              | Am J Hum Genet                        | 80  | 361   | 2007 |
| Huntington disease-like 2                                | <i>JPH3</i>   | 16q24.2         | CTG | 6-27                 | 44-57   | exon 2A       | Holmes            | Nat Genet                             | 29  | 377   | 2001 |
| Juvenile myoclonic epilepsy, decreased risk, association | <i>KCNN3</i>  | 1q21.3          | CAG | 13-18, 20-21         | 19      | 3' gene       | Vijai             | J Med Genet                           | 42  | 439   | 2005 |
| Ataxia, association                                      | <i>KCNN3</i>  | 1q21.3          | CAG | 18-20                | ≥22     | 3' gene       | Figueroa          | Arch Neurol                           | 58  | 1649  | 2001 |
| Mental retardation ?                                     | <i>MECP2B</i> | Xq28            | GCN | 7                    | 10      | coding region | Harvey            | Am J Med Genet B Neuropsychiatr Genet | 144 | 355   | 2007 |
| Mental retardation ?                                     | <i>MECP2B</i> | Xq28            | GCN | 7                    | 5       | coding region | Harvey            | Am J Med Genet B Neuropsychiatr Genet | 144 | 355   | 2007 |
| Behcet disease, association                              | <i>MICA</i>   | ND              | GCT | 4,5,6,9              | 6       | exon 5        | Mizuki            | Proc Natl Acad Sci USA                | 94  | 1298  | 1997 |
| Breast cancer, risk, association                         | <i>NCOA3</i>  | 20q13.12        | Gln | 20-27                | 28-29   | coding region | Rebbeck           | Cancer Res                            | 61  | 5420  | 2001 |

|                                            |                |          |     |       |                 |               |                 |                           |     |      |      |
|--------------------------------------------|----------------|----------|-----|-------|-----------------|---------------|-----------------|---------------------------|-----|------|------|
| Lower FENO in asthmatics, association      | <i>NOS1</i>    | 12q24.22 | AAT | 8-17  | ≥12             | IVS20         | Wechsler        | Am J Respir Crit Care Med | 162 | 2043 | 2000 |
| Schizophrenia, association                 | <i>NUMBL</i>   | 19q13.2  | CAG | 14-20 | 18              | coding region | Passos Gregorio | Schizophr Res             | 88  | 275  | 2006 |
| Oculopharyngeal muscular dystrophy         | <i>PABPN1</i>  | 14q11.2  | GCG | 6     | 7-13            | coding region | Brais           | Nat Genet                 | 18  | 164  | 1998 |
| Increased transcription, association       | <i>PAX7</i>    | 1p36.13  | CCT | 8-11  | 11              | promoter      | Syagailo        | Gene                      | 294 | 259  | 2002 |
| Low LDL cholesterol, association           | <i>PCSK9</i>   | 1p32.3   | CTG | 9     | 10              | coding region | Yue             | Hum Mutat                 | 27  | 460  | 2006 |
| Schizophrenia, association                 | <i>PHOX2B</i>  | 4p13     | GCN | 20    | 13, 15, 22      | coding region | Toyota          | Hum Mol Genet             | 13  | 551  | 2004 |
| Central hypoventilation syndrome           | <i>PHOX2B</i>  | 4p13     | GCN | 20    | 25-29           | coding region | Amiel           | Nat Genet                 | 33  | 459  | 2003 |
| Central hypoventilation syndrome           | <i>PHOX2B</i>  | 4p13     | GCN | 20    | 25-30           | coding region | Sasaki          | Hum Genet                 | 114 | 22   | 2003 |
| Central hypoventilation syndrome           | <i>PHOX2B</i>  | 4p13     | GCN | 20    | 25-33           | coding region | Matera          | J Med Genet               | 41  | 373  | 2004 |
| Central hypoventilation syndrome           | <i>PHOX2B</i>  | 4p13     | GCN | 20    | 26              | coding region | Chen            | J Formos Med Assoc        | 106 | 69   | 2007 |
| Male subfertility, association             | <i>POLG</i>    | 15q26.1  | CAG | 5-13  | 10              | coding region | Harris          | Int J Androl              | 29  | 421  | 2006 |
| Parkinson disease, association             | <i>POLG</i>    | 15q26.1  | CAG | 6-14  | 6, 8, 9, 12, 13 | coding region | Luoma           | Neurology                 | 69  | 1152 | 2007 |
| Spinocerebellar ataxia 12                  | <i>PPP2R2B</i> | 5q32     | CAG | 7-28  | 66-78           | 5' flanking   | Holmes          | Nat Genet                 | 23  | 391  | 1999 |
| Spinocerebellar ataxia 12                  | <i>PPP2R2B</i> | 5q32     | CAG | 7-31  | 55-78           | promoter      | Brusco          | Arch Neurol               | 61  | 727  | 2004 |
| Reduced expression, association            | <i>RELN</i>    | 7q22.1   | GGC | 4-13  | 13              | 5' UTR        | Persico         | J Neural Transm           | 113 | 1373 | 2006 |
| Increased insulin sensitivity, association | <i>RETN</i>    | 19p13.2  | ATG | 7     | 6               | 3' UTR        | Pizzuti         | J Clin Endocrinol Metab   | 87  | 4403 | 2002 |
| Cleidocranial dysplasia                    | <i>RUNX2</i>   | 6p12.3   | GCK | 17    | 27              | coding region | Mundlos         | Cell                      | 89  | 773  | 1997 |
| Cataract formation in myotonic dystrophy   | <i>SIX5</i>    | 19q13.32 | CTG | 5-37  | ≥50             | promoter      | Winchester      | Hum Mol Genet             | 8   | 481  | 1999 |
| Spinocerebellar ataxia 17                  | <i>TBP</i>     | 6q27     | CAG | 25-42 | 45-63           | coding region | Brusco          | Arch Neurol               | 61  | 727  | 2004 |
| Spinocerebellar ataxia 17                  | <i>TBP</i>     | 6q27     | CAG | 27-44 | 50-55           | coding region | Zuhlke          | Eur J Hum Genet           | 9   | 160  | 2001 |
| Spinocerebellar ataxia 17                  | <i>TBP</i>     | 6q27     | CAG | 31-42 | 63              | coding region | Koide           | Hum Mol Genet             | 8   | 2047 | 1999 |

|                                       |               |         |     |      |       |               |           |               |    |      |      |
|---------------------------------------|---------------|---------|-----|------|-------|---------------|-----------|---------------|----|------|------|
| Spinocerebellar ataxia 17             | <i>TBP</i>    | 6q27    | CAG | 49   | 52-53 | coding region | Zuhlke    | BMC Med Genet | 6  | 27   | 2005 |
| Colorectal cancer, association        | <i>TGFBR1</i> | 9q22.33 | GCG | 9    | 6     | exon 1        | Bian      | J Clin Oncol  | 23 | 3074 | 2005 |
| Bone mineral density, association     | <i>VLDLR</i>  | 9p24.2  | CGG | 5-10 | ≥8    | 5' UTR        | Yamada    | Genomics      | 86 | 76   | 2005 |
| Dementia, increased risk, association | <i>VLDLR</i>  | 9p24.2  | CGG | 5-11 | 5     | 5' UTR        | Helbecque | Neurology     | 56 | 1183 | 2001 |

pm = premutation

K = G or T

N = A, C, G or T

Y = C or T

ND = not determined

HDCRG = Huntington's Disease Collaborative Research Group

Note: the number of repeats in normal and disease-associated states does not differentiate between homo- and heterozygosity and the presence/absence of repeat interruptions.

**Supplementary Table 2. EMAST in human cancer**

| Author's marker | UCSC marker (hg18) | Chromosomal location | Gene            | Gene location | mRNA                   | Protein                                                                                      | Reference Genome Sequence            | Sequence designation (this work) | Tumor                      | MSI% (1) | Author     | Journal          | Vol. | Page | Year |
|-----------------|--------------------|----------------------|-----------------|---------------|------------------------|----------------------------------------------------------------------------------------------|--------------------------------------|----------------------------------|----------------------------|----------|------------|------------------|------|------|------|
| D8S311          | D8S392             | 8p11.21              | <i>ANK1</i>     | Intron 1      | NM_000037              | ankyrin 1 isoform 4                                                                          | (GAAA)17                             | AAAG                             | Non-small cell lung cancer | 21       | Woenckhaus | Int J Oncol      | 23   | 1357 | 2003 |
| D8S1179         | CHLC.GATA7 G07     | 8q24.13              | <i>DA879437</i> | Intron        | Spliced EST            |                                                                                              | (TCTA)11                             | AGAT                             | Gastro-intestinal          | 17       | Vauhkonen  | Forensic Sci Int | 139  | 159  | 2004 |
| D19S433         | GGAA2A03           | 19q12                | <i>C19orf2</i>  | Intron 1      | NM_003796              | RPB5-mediating protein                                                                       | (AGGA)13                             | AAGG                             | Gastro-intestinal          | 17       | Vauhkonen  | Forensic Sci Int | 139  | 159  | 2004 |
| D21S11          | D21S11             | 21q21.1              | None            | None          |                        |                                                                                              | (TCTA)11                             | AGAT                             | Gastro-intestinal          | 15       | Vauhkonen  | Forensic Sci Int | 139  | 159  | 2004 |
| D18S51          | UT574              | 18q21.33             | <i>BCL2</i>     | Intron 1      | NM_000633              | B-cell lymphoma protein 2                                                                    | (GAAA)18                             | AAAG                             | Gastro-intestinal          | 15       | Vauhkonen  | Forensic Sci Int | 139  | 159  | 2004 |
| L17686          | D7S1482            | 7q31.32              | None            | None          |                        |                                                                                              | R230 (2) including (GAAA)18 (GAAG)10 | AAAG - AAGG                      | Non-small cell lung cancer | 14       | Ahrendt    | Cancer Res       | 60   | 2488 | 2000 |
| VWA             | VWF                | 12p13.31             | <i>VWF</i>      | Intron        | NM_000552              | von Willebrand factor preproprotein                                                          | (TCTG)5 (TCTA)11                     | ACAG - AGAT                      | Gastro-intestinal          | 12       | Vauhkonen  | Forensic Sci Int | 139  | 159  | 2004 |
| FGA             | FGA                | 4q32.1               | <i>FGA</i>      | Intron        | NM_021871<br>NM_000508 | fibrinogen, alpha polypeptide isoform alpha<br>fibrinogen, alpha polypeptide isoform alpha-E | (TTTC)14                             | AAAG                             | Gastro-intestinal          | 12       | Vauhkonen  | Forensic Sci Int | 139  | 159  | 2004 |
| D13S317         | CHLC.GATA7 G10     | 13q31.1              | None            | None          |                        |                                                                                              | (TATC)11                             | AGAT                             | Gastro-intestinal          | 12       | Vauhkonen  | Forensic Sci Int | 139  | 159  | 2004 |
| L17686          | D7S1482            | 7q31.32              | None            | None          |                        |                                                                                              | R230 (2) including (GAAA)18 (GAAG)10 | AAAG - AAGG                      | Non-small cell lung cancer | 11       | Xu         | Int J Cancer     | 91   | 200  | 2001 |

|         |                |            |                 |        |                                                              |                                                                        |                                         |             |                            |    |           |                  |     |      |      |
|---------|----------------|------------|-----------------|--------|--------------------------------------------------------------|------------------------------------------------------------------------|-----------------------------------------|-------------|----------------------------|----|-----------|------------------|-----|------|------|
| CSF1PO  | GDB:212649     | 5q33.1     | <i>CSF1R</i>    | Intron | NM_005211                                                    | colony stimulating factor 1 receptor precursor semaphorin 3A precursor | (ATAG)13                                | AGAT        | Gastro-intestinal          | 10 | Vauhkonen | Forensic Sci Int | 139 | 159  | 2004 |
| D7S820  | GATA3F01       | 7q21.11    | <i>SEMA3A</i>   | Intron | NM_006080                                                    |                                                                        | (GATA)13                                | AGAT        | Gastro-intestinal          | 10 | Vauhkonen | Forensic Sci Int | 139 | 159  | 2004 |
| D8S321  | D8S321         | 8q24.21    | <i>CD518126</i> | Intron | Spliced EST                                                  |                                                                        | R189 (1) including (GAAA)11             | AAAG        | Non-small cell lung cancer | 9  | Xu        | Int J Cancer     | 91  | 200  | 2001 |
| UT5307  | No Matches     | 8 (Author) |                 |        |                                                              |                                                                        | (AAAG)19 (Author)                       | AAAG        | Non-small cell lung cancer | 9  | Xu        | Int J Cancer     | 91  | 200  | 2001 |
| D20S82  | UT250          | 20p12.3    | <i>BC038533</i> | Intron | Spliced EST                                                  |                                                                        | (GAAA)17                                | AAAG        | Non-small cell lung cancer | 8  | Ahrendt   | Cancer Res       | 60  | 2488 | 2000 |
| UT5320  | UT5320         | 8q24.13    | <i>CD676340</i> | Intron | Spliced EST                                                  |                                                                        | R171 (2) including (GAAA)14 and (AAGG)8 | AAAG - AAGG | Non-small cell lung cancer | 7  | Ahrendt   | Cancer Res       | 60  | 2488 | 2000 |
| UT5320  | UT5320         | 8q24.13    | <i>CD676340</i> | Intron | Spliced EST                                                  |                                                                        | R171 (2) including (GAAA)14 and (AAGG)8 | AAAG - AAGG | Non-small cell lung cancer | 7  | Xu        | Int J Cancer     | 91  | 200  | 2001 |
| D20S82  | UT250          | 20p12.3    | <i>BC038533</i> | Intron | Spliced EST                                                  |                                                                        | (GAAA)17                                | AAAG        | Non-small cell lung cancer | 7  | Xu        | Int J Cancer     | 91  | 200  | 2001 |
| D5S818  | CHLC.GATA3 F03 | 5q23.2     | None            | None   |                                                              |                                                                        | (AGAT)11                                | AGAT        | Gastro-intestinal          | 7  | Vauhkonen | Forensic Sci Int | 139 | 159  | 2004 |
| D16S539 | SHGC-17627     | 16q24.1    | None            | None   |                                                              |                                                                        | (GATA)11                                | AGAT        | Gastro-intestinal          | 7  | Vauhkonen | Forensic Sci Int | 139 | 159  | 2004 |
| D2S1338 | GGAA3A09       | 2q35       | None            | None   |                                                              |                                                                        | (CCTT)13                                | AAGG        | Gastro-intestinal          | 7  | Vauhkonen | Forensic Sci Int | 139 | 159  | 2004 |
| CSF1R   | CSF1R          | 5q33.1     | <i>PDGFRB</i>   | Exon   | NM_002609 + ESTs by transcription initiation and termination | platelet-derived growth factor receptor beta                           | (TAGA) (Author)                         | AGAT        | Non-small cell lung cancer | 6  | Xu        | Int J Cancer     | 91  | 200  | 2001 |
| ACTBP2  | No Matches     | 5 (Author) |                 |        |                                                              |                                                                        | (AAAG)11 (AAAG)15 Author                | AAAG        | Non-small cell lung cancer | 5  | Xu        | Int J Cancer     | 91  | 200  | 2001 |
| D11S488 | D11S488        | 11q24.1    | 8 ESTs          | Intron | Spliced ESTs                                                 |                                                                        | R171 (2) including (AAAG)7 - (AAGG)10   | AAAG - AAGG | Non-small cell lung cancer | 5  | Xu        | Int J Cancer     | 91  | 200  | 2001 |

|          |            |            |          |        |                           |                                                                |                                       |             |                            |   |           |                  |     |      |      |
|----------|------------|------------|----------|--------|---------------------------|----------------------------------------------------------------|---------------------------------------|-------------|----------------------------|---|-----------|------------------|-----|------|------|
| D9S242   | UT914      | 9q33.3     | None     | None   |                           |                                                                | (AGAA)15                              | AAAG        | Non-small cell lung cancer | 5 | Xu        | Int J Cancer     | 91  | 200  | 2001 |
| D20S85   | UT236      | 20q12      | None     | None   |                           |                                                                | (TTTC)15                              | AAAG        | Non-small cell lung cancer | 5 | Xu        | Int J Cancer     | 91  | 200  | 2001 |
| D3S1358  | D3S1358    | 3p21.31    | LARS2    | Intron | NM_015340                 | leucyl-tRNA synthetase 2, mitochondrial                        | (ATAG)14                              | AGAT        | Gastro-intestinal          | 5 | Vauhkonen | Forensic Sci Int | 139 | 159  | 2004 |
| D8S321   | D8S321     | 8q24.21    | CD518126 | Intron | Spliced EST               |                                                                | R189 (2) including (GAAA)11           | AAAG        | Non-small cell lung cancer | 4 | Ahrendt   | Cancer Res.      | 60  | 2488 | 2000 |
| D9S753   | UT8063     | 9q22.32    | None     | None   |                           |                                                                | (GAAA)9                               | AAAG        | Non-small cell lung cancer | 4 | Xu        | Int J Cancer     | 91  | 200  | 2001 |
| D20S77   | UT235      | 20p13      | AW614549 | Intron | Spliced EST               |                                                                | R273 (2) including (GAAA)15           | AAAG        | Non-small cell lung cancer | 4 | Xu        | Int J Cancer     | 91  | 200  | 2001 |
| L17835   | UT1496     | 7p11.2     | None     | None   |                           |                                                                | (AAGG)16                              | AAGG        | Non-small cell lung cancer | 3 | Ahrendt   | Cancer Res       | 60  | 2488 | 2000 |
| D20S85   | UT236      | 20q12      | None     | None   |                           |                                                                | (TTTC)15                              | AAAG        | Non-small cell lung cancer | 3 | Ahrendt   | Cancer Res       | 60  | 2488 | 2000 |
| UT5307   | No Matches | 8 (Author) |          |        |                           |                                                                | (AAAG)19 (Author)                     | AAAG        | Non-small cell lung cancer | 2 | Ahrendt   | Cancer Res       | 60  | 2488 | 2000 |
| D9S242   | UT914      | 9q33.3     | None     | None   |                           |                                                                | (AGAA)15                              | AAAG        | Non-small cell lung cancer | 2 | Ahrendt   | Cancer Res       | 60  | 2488 | 2000 |
| TPOX     | GDB:196336 | 2p25.3     | TPO      | Intron | NM_000547<br>NM_175719-22 | thyroid peroxidase isoform a<br>thyroid peroxidase isoform b-e | (TGAA)8                               | AATG        | Gastro-intestinal          | 2 | Vauhkonen | Forensic Sci Int | 139 | 159  | 2004 |
| G29028   | C19-11H65  | 19p13.11   | CPAMD8   | Intron | NM_015692                 | alpha-2-macroglobulin domain                                   | R218 (2) including (AAGG)7 (AAAG)19   | AAAG - AAGG | Non-small cell lung cancer | 1 | Ahrendt   | Cancer Res       | 60  | 2488 | 2000 |
| D11S488  | D11S488    | 11q24.1    | 8 ESTs   | Intron | Spliced ESTs              |                                                                | R171 (2) including (AAAG)7 - (AAGG)10 | AAAG - AAGG | Non-small cell lung cancer | 1 | Ahrendt   | Cancer Res       | 60  | 2488 | 2000 |
| ACTbeta2 | No Matches | 5 (Author) |          |        |                           |                                                                | (AAAG)11 (AAAG)15 Author              | AAAG        | Non-small cell lung cancer | 1 | Ahrendt   | Cancer Res       | 60  | 2488 | 2000 |

|         |                    |         |                                  |                         |              |                                               |                |                                   |                                             |         |            |    |      |      |
|---------|--------------------|---------|----------------------------------|-------------------------|--------------|-----------------------------------------------|----------------|-----------------------------------|---------------------------------------------|---------|------------|----|------|------|
| G08460  | CHLC.GATA5<br>2G02 | 5p14.1  | BE728951                         | Intron 1                | Spliced EST  | (TCTA)11                                      | AGAT           | Non-small<br>cell lung<br>cancer  | 1                                           | Ahrendt | Cancer Res | 60 | 2488 | 2000 |
| D7S1482 | D7S1482            | 7q31.32 | None                             | None                    |              | R230 (2)<br>including<br>(GAAA)18<br>(GAAG)10 | AAAG -<br>AAGG | Non<br>melanoma<br>skin<br>cancer | EMAST<br>in 75%<br>of<br>tumors<br>(Note 3) | Danaee  | Oncogene   | 21 | 4894 | 2002 |
| D7S1482 | D7S1482            | 7q31.32 | None                             | None                    |              | R230 (2)<br>including<br>(GAAA)18<br>(GAAG)10 | AAAG -<br>AAGG | Bladder                           | EMAST<br>in 44%<br>of<br>tumors<br>(Note 3) | Danaee  | Oncogene   | 21 | 4894 | 2002 |
| D9S303  | CHLC.GATA3<br>D04  | 9q21.32 | BG674167                         | Intron                  | Spliced EST  | (GATA)12                                      | AGAT           |                                   | Note (3)                                    | Danaee  | Oncogene   | 21 | 4894 | 2002 |
| D20S82  | UT250              | 20p12.3 | BC038533                         | Intron                  | Spliced EST  | (GAAA)17                                      | AAAG           |                                   | Note (3)                                    | Danaee  | Oncogene   | 21 | 4894 | 2002 |
| D7S1485 | UT1496             | 7p11.2  | None                             | None                    |              | (AAGG)16                                      | AAGG           |                                   | Note (3)                                    | Danaee  | Oncogene   | 21 | 4894 | 2002 |
| D9S242  | UT914              | 9q33.3  | None                             | None                    |              | (AGAA)15                                      | AAAG           |                                   | Note (3)                                    | Danaee  | Oncogene   | 21 | 4894 | 2002 |
| D5S1502 | CHLC.GATA5<br>2G02 | 5p14.1  | BE728951                         | Intron 1                | Spliced EST  | (TCTA)11                                      | AGAT           |                                   | Note (3)                                    | Danaee  | Oncogene   | 21 | 4894 | 2002 |
| D9S252  | UT2103             | 9q21.33 | BX089714<br>AA868955<br>AA861911 | Intron<br>Transcription | Spliced ESTs | (GATA)10                                      | AGAT           |                                   | Note (3)                                    | Danaee  | Oncogene   | 21 | 4894 | 2002 |

(1) %MSI = percent of tumor samples showing microsatellite instability.

(2) Rx = Homopurine tract containing x number of purine bases.

(3) EMAST = Elevated microsatellite instability at selected tetraNRs. % EMAST in both non melanoma skin cancer and bladder tumors is for all 7 (D7S1482, D9S303, D20S82, D7S1485, D9S242, D5S1502, D9S252) markers combined.



**Supplementary Table 3. Enrichment of human genes containing micro/minisatellites tracts in cDNAs**

| <b>A. ALL LOCATIONS - 2315 non-redundant genes (311 not in databases)</b> |                                                                          |                      |                 |          |
|---------------------------------------------------------------------------|--------------------------------------------------------------------------|----------------------|-----------------|----------|
| Database                                                                  | Enriched Term                                                            | Number of test genes | % of test genes | P-Value  |
| GOBP                                                                      | regulation of cellular process                                           | 628                  | 0.27            | 2.31E-38 |
|                                                                           | regulation of biological process                                         | 659                  | 0.28            | 3.86E-38 |
|                                                                           | regulation of cellular physiological process                             | 598                  | 0.26            | 9.16E-36 |
|                                                                           | regulation of metabolism                                                 | 484                  | 0.21            | 9.86E-35 |
|                                                                           | regulation of physiological process                                      | 606                  | 0.26            | 3.89E-34 |
|                                                                           | regulation of cellular metabolism                                        | 469                  | 0.20            | 4.53E-33 |
|                                                                           | regulation of nucleobase, nucleoside, nucleotide and nucleic acid metab. | 449                  | 0.19            | 1.09E-32 |
|                                                                           | regulation of transcription                                              | 444                  | 0.19            | 1.60E-32 |
|                                                                           | development                                                              | 374                  | 0.16            | 7.20E-32 |
|                                                                           | regulation of transcription, DNA-dependent                               | 418                  | 0.18            | 4.44E-31 |
|                                                                           | transcription                                                            | 452                  | 0.20            | 3.63E-30 |
|                                                                           | transcription, DNA-dependent                                             | 424                  | 0.18            | 6.14E-30 |
|                                                                           | nucleus                                                                  | 643                  | 0.28            | 9.28E-22 |
| GOCC                                                                      | intracellular membrane-bound organelle                                   | 798                  | 0.34            | 1.57E-09 |
|                                                                           | membrane-bound organelle                                                 | 798                  | 0.34            | 1.64E-09 |
|                                                                           | integral to plasma membrane                                              | 200                  | 0.09            | 2.20E-07 |
|                                                                           | intrinsic to plasma membrane                                             | 201                  | 0.09            | 2.26E-07 |
|                                                                           | plasma membrane                                                          | 257                  | 0.11            | 2.62E-05 |
|                                                                           | synapse                                                                  | 32                   | 0.01            | 4.79E-05 |
| GOMF                                                                      | transcription regulator activity                                         | 311                  | 0.13            | 2.01E-40 |
|                                                                           | protein binding                                                          | 710                  | 0.31            | 2.01E-33 |
|                                                                           | transcription factor activity                                            | 226                  | 0.10            | 2.47E-29 |
|                                                                           | binding                                                                  | 1447                 | 0.63            | 1.12E-28 |
|                                                                           | DNA binding                                                              | 397                  | 0.17            | 7.57E-28 |
|                                                                           | sequence-specific DNA binding                                            | 122                  | 0.05            | 3.83E-23 |
|                                                                           | nucleic acid binding                                                     | 525                  | 0.23            | 4.41E-19 |
|                                                                           | RNA polymerase II transcription factor activity                          | 67                   | 0.03            | 1.25E-16 |

|              |                                           |     |      |          |
|--------------|-------------------------------------------|-----|------|----------|
| KEGG Pathway | HSA04360:AXON GUIDANCE                    | 37  | 0.02 | 2.27E-05 |
|              | HSA04010:MAPK SIGNALING PATHWAY           | 57  | 0.02 | 2.10E-04 |
|              | HSA04310:WNT SIGNALING PATHWAY            | 36  | 0.02 | 2.45E-04 |
|              | HSA04810:REGULATION OF ACTIN CYTOSKELETON | 45  | 0.02 | 5.70E-04 |
|              | HSA04020:CALCIUM SIGNALING PATHWAY        | 38  | 0.02 | 1.68E-03 |
|              | HSA04350:TGF-BETA SIGNALING PATHWAY       | 22  | 0.01 | 2.14E-03 |
|              | HSA04520:ADHERENS JUNCTION                | 20  | 0.01 | 4.77E-03 |
| SP - PIR     | nuclear protein                           | 552 | 0.24 | 1.51E-59 |
|              | transcription                             | 334 | 0.14 | 8.55E-58 |
|              | transcription regulation                  | 334 | 0.14 | 1.03E-55 |
|              | dna-binding                               | 319 | 0.14 | 1.86E-47 |
|              | phosphorylation                           | 352 | 0.15 | 1.89E-40 |
|              | activator                                 | 101 | 0.04 | 3.31E-26 |
|              | developmental protein                     | 111 | 0.05 | 2.53E-20 |
|              | membrane                                  | 498 | 0.22 | 9.62E-20 |
|              | repressor                                 | 65  | 0.03 | 1.02E-16 |
|              | signal                                    | 348 | 0.15 | 3.82E-16 |
|              | triplet repeat expansion                  | 19  | 0.01 | 2.47E-15 |
|              | chromosomal translocation                 | 53  | 0.02 | 8.41E-15 |
|              | metal-binding                             | 313 | 0.14 | 7.44E-14 |

---

**B. 5'UTR - 537 non-redundant genes (56 not in databases)**

---

| Database | Enriched Term                                                            | Number of test genes | % of test genes | P-Value  |
|----------|--------------------------------------------------------------------------|----------------------|-----------------|----------|
| GOBP     | regulation of cellular process                                           | 152                  | 0.28            | 1.23E-09 |
|          | regulation of biological process                                         | 158                  | 0.29            | 3.46E-09 |
|          | development                                                              | 94                   | 0.18            | 3.69E-09 |
|          | regulation of cellular physiological process                             | 145                  | 0.27            | 4.03E-09 |
|          | regulation of physiological process                                      | 146                  | 0.27            | 1.64E-08 |
|          | regulation of metabolism                                                 | 113                  | 0.21            | 1.44E-07 |
|          | regulation of transcription, DNA-dependent                               | 97                   | 0.18            | 9.97E-07 |
|          | regulation of nucleobase, nucleoside, nucleotide and nucleic acid metab. | 103                  | 0.19            | 1.07E-06 |

|              |                                                        |     |      |          |
|--------------|--------------------------------------------------------|-----|------|----------|
| GOCC         | nervous system development                             | 34  | 0.06 | 1.11E-06 |
|              | system development                                     | 34  | 0.06 | 1.34E-06 |
|              | regulation of cellular metabolism                      | 107 | 0.20 | 1.36E-06 |
|              | regulation of transcription                            | 101 | 0.19 | 1.89E-06 |
|              | nucleus                                                | 150 | 0.28 | 1.73E-05 |
|              | integral to plasma membrane                            | 51  | 0.10 | 2.29E-03 |
|              | intrinsic to plasma membrane                           | 51  | 0.10 | 2.64E-03 |
|              | synapse                                                | 10  | 0.02 | 8.31E-03 |
|              | intracellular membrane-bound organelle                 | 181 | 0.34 | 2.32E-02 |
|              | membrane-bound organelle                               | 181 | 0.34 | 2.35E-02 |
| GOMF         | postsynaptic membrane                                  | 7   | 0.01 | 2.42E-02 |
|              | protein binding                                        | 176 | 0.33 | 1.28E-10 |
|              | transcription regulator activity                       | 73  | 0.14 | 1.92E-09 |
|              | RNA polymerase II transcription factor activity        | 22  | 0.04 | 7.60E-08 |
|              | binding                                                | 341 | 0.64 | 2.48E-07 |
|              | transcription factor activity                          | 51  | 0.10 | 2.43E-06 |
|              | DNA binding                                            | 90  | 0.17 | 5.06E-06 |
|              | protein kinase activity                                | 37  | 0.07 | 1.35E-05 |
|              | phosphotransferase activity, alcohol group as acceptor | 40  | 0.07 | 4.57E-05 |
|              | HSA04020:CALCIUM SIGNALING PATHWAY                     | 13  | 0.02 | 1.55E-02 |
| KEGG Pathway | HSA04720:LONG-TERM POTENTIATION                        | 7   | 0.01 | 1.90E-02 |
| SP-PIR       | nuclear protein                                        | 137 | 0.26 | 2.32E-17 |
|              | transcription                                          | 78  | 0.15 | 2.61E-13 |
|              | transcription regulation                               | 78  | 0.15 | 6.96E-13 |
|              | phosphorylation                                        | 86  | 0.16 | 3.62E-11 |
|              | dna-binding                                            | 74  | 0.14 | 6.00E-11 |
|              | membrane                                               | 133 | 0.25 | 1.33E-09 |
|              | repressor                                              | 20  | 0.04 | 4.49E-07 |
|              | transferase                                            | 57  | 0.11 | 8.38E-07 |
|              | serine/threonine-protein kinase                        | 25  | 0.05 | 1.56E-06 |
|              | kinase                                                 | 38  | 0.07 | 1.54E-05 |
|              | serine/threonine-specific protein kinase               | 10  | 0.02 | 1.90E-05 |
|              | activator                                              | 22  | 0.04 | 1.90E-05 |
|              | nucleotide-binding                                     | 54  | 0.10 | 3.82E-05 |

| C. ORF - 661 non-redundant genes (68 not in databases) |                                                                              |                      |                 |          |
|--------------------------------------------------------|------------------------------------------------------------------------------|----------------------|-----------------|----------|
| Database                                               | Enriched Term                                                                | Number of test genes | % of test genes | P-Value  |
| GOBP                                                   | transcription                                                                | 177                  | 0.27            | 7.67E-27 |
|                                                        | regulation of transcription                                                  | 172                  | 0.26            | 7.85E-27 |
|                                                        | regulation of nucleobase, nucleoside, nucleotide and nucleic acid metabolism | 173                  | 0.26            | 1.28E-26 |
|                                                        | regulation of cellular metabolism                                            | 179                  | 0.27            | 1.31E-26 |
|                                                        | regulation of metabolism                                                     | 182                  | 0.28            | 1.50E-26 |
|                                                        | regulation of cellular physiological process                                 | 211                  | 0.32            | 3.58E-24 |
|                                                        | regulation of biological process                                             | 227                  | 0.34            | 3.93E-24 |
|                                                        | regulation of transcription, DNA-dependent                                   | 159                  | 0.24            | 5.98E-24 |
|                                                        | transcription, DNA-dependent                                                 | 162                  | 0.25            | 6.45E-24 |
|                                                        | regulation of physiological process                                          | 214                  | 0.32            | 1.02E-23 |
|                                                        | regulation of cellular process                                               | 216                  | 0.33            | 1.59E-23 |
|                                                        | nucleobase, nucleoside, nucleotide and nucleic acid metabolism               | 207                  | 0.31            | 3.07E-19 |
| GOCC                                                   | nucleus                                                                      | 268                  | 0.41            | 1.20E-29 |
|                                                        | intracellular membrane-bound organelle                                       | 304                  | 0.46            | 2.77E-16 |
|                                                        | membrane-bound organelle                                                     | 304                  | 0.46            | 2.86E-16 |
|                                                        | intracellular organelle                                                      | 336                  | 0.51            | 1.42E-13 |
|                                                        | organelle                                                                    | 336                  | 0.51            | 1.49E-13 |
|                                                        | intracellular                                                                | 369                  | 0.56            | 1.66E-09 |
|                                                        | nuclear lumen                                                                | 33                   | 0.05            | 6.78E-06 |
| GOMF                                                   | DNA binding                                                                  | 170                  | 0.26            | 4.12E-30 |
|                                                        | transcription regulator activity                                             | 126                  | 0.19            | 1.24E-28 |
|                                                        | nucleic acid binding                                                         | 217                  | 0.33            | 1.08E-26 |
|                                                        | transcription factor activity                                                | 88                   | 0.13            | 1.02E-18 |
|                                                        | sequence-specific DNA binding                                                | 56                   | 0.08            | 1.41E-18 |
|                                                        | binding                                                                      | 444                  | 0.67            | 4.86E-15 |
|                                                        | protein binding                                                              | 219                  | 0.33            | 5.17E-13 |
|                                                        | RNA polymerase II transcription factor activity                              | 29                   | 0.04            | 8.72E-11 |
| KEGG Pathway                                           | HSA04010:MAPK SIGNALING PATHWAY                                              | 19                   | 0.03            | 2.29E-03 |

|        |                                     |     |      |          |
|--------|-------------------------------------|-----|------|----------|
| SP-PIR | HSA04520:ADHERENS JUNCTION          | 8   | 0.01 | 1.22E-02 |
|        | HSA04930:TYPE II DIABETES MELLITUS  | 6   | 0.01 | 1.39E-02 |
|        | HSA04350:TGF-BETA SIGNALING PATHWAY | 8   | 0.01 | 1.77E-02 |
|        | HSA00790:FOLATE BIOSYNTHESIS        | 5   | 0.01 | 2.76E-02 |
|        | HSA03030:DNA POLYMERASE             | 4   | 0.01 | 4.22E-02 |
|        | nuclear protein                     | 225 | 0.34 | 6.56E-49 |
|        | dna-binding                         | 138 | 0.21 | 4.74E-38 |
|        | transcription regulation            | 122 | 0.18 | 1.12E-28 |
|        | transcription                       | 120 | 0.18 | 2.75E-28 |
|        | triplet repeat expansion            | 17  | 0.03 | 6.54E-21 |
|        | activator                           | 44  | 0.07 | 3.41E-17 |
|        | phosphorylation                     | 111 | 0.17 | 4.10E-15 |
|        | homeobox                            | 32  | 0.05 | 5.38E-12 |
|        | zinc-finger                         | 81  | 0.12 | 1.46E-09 |
|        | zinc                                | 91  | 0.14 | 8.13E-09 |
|        | developmental protein               | 37  | 0.06 | 2.13E-08 |
|        | coiled coil                         | 56  | 0.08 | 2.87E-08 |
|        | DNA binding                         | 34  | 0.05 | 1.01E-07 |

---

**D. 3'UTR - 1289 non-redundant genes (171 not in databases)**

---

| Database | Enriched Term                                                            | Number of test genes | % of test genes | P-Value  |
|----------|--------------------------------------------------------------------------|----------------------|-----------------|----------|
| GOBP     | regulation of cellular process                                           | 326                  | 0.25            | 2.55E-15 |
|          | regulation of biological process                                         | 341                  | 0.26            | 8.10E-15 |
|          | development                                                              | 198                  | 0.15            | 1.03E-14 |
|          | regulation of cellular physiological process                             | 306                  | 0.24            | 2.95E-13 |
|          | regulation of metabolism                                                 | 246                  | 0.19            | 5.24E-13 |
|          | regulation of physiological process                                      | 310                  | 0.24            | 1.63E-12 |
|          | regulation of transcription, DNA-dependent                               | 214                  | 0.17            | 3.01E-12 |
|          | regulation of transcription                                              | 224                  | 0.17            | 6.93E-12 |
|          | regulation of cellular metabolism                                        | 236                  | 0.18            | 8.30E-12 |
|          | regulation of nucleobase, nucleoside, nucleotide and nucleic acid metab. | 226                  | 0.18            | 8.58E-12 |

|              |                                           |     |      |          |
|--------------|-------------------------------------------|-----|------|----------|
| GOCC         | transcription, DNA-dependent              | 217 | 0.17 | 1.03E-11 |
|              | system development                        | 70  | 0.05 | 6.56E-11 |
|              | intrinsic to plasma membrane              | 124 | 0.10 | 7.59E-08 |
|              | integral to plasma membrane               | 123 | 0.10 | 9.31E-08 |
|              | plasma membrane                           | 162 | 0.13 | 1.70E-07 |
|              | nucleus                                   | 298 | 0.23 | 1.04E-03 |
|              | synaptic vesicle                          | 11  | 0.01 | 1.07E-03 |
|              | synapse                                   | 18  | 0.01 | 2.59E-03 |
|              | membrane-bound vesicle                    | 21  | 0.02 | 3.92E-03 |
|              | protein binding                           | 378 | 0.29 | 2.83E-15 |
| GOMF         | transcription regulator activity          | 154 | 0.12 | 2.94E-15 |
|              | transcription factor activity             | 116 | 0.09 | 1.03E-12 |
|              | binding                                   | 779 | 0.60 | 2.08E-12 |
|              | sequence-specific DNA binding             | 61  | 0.05 | 1.05E-09 |
|              | DNA binding                               | 184 | 0.14 | 6.73E-07 |
|              | metal ion binding                         | 280 | 0.22 | 1.08E-06 |
|              | ion binding                               | 280 | 0.22 | 1.08E-06 |
|              | HSA04360:AXON GUIDANCE                    | 27  | 0.02 | 5.54E-06 |
|              | HSA04510:FOCAL ADHESION                   | 29  | 0.02 | 1.55E-03 |
|              | HSA04810:REGULATION OF ACTIN CYTOSKELETON | 28  | 0.02 | 2.27E-03 |
| KEGG Pathway | HSA04310:WNT SIGNALING PATHWAY            | 22  | 0.02 | 2.40E-03 |
|              | HSA04630:JAK-STAT SIGNALING PATHWAY       | 21  | 0.02 | 6.66E-03 |
|              | HSA04350:TGF-BETA SIGNALING PATHWAY       | 13  | 0.01 | 1.93E-02 |
|              | HSA04010:MAPK SIGNALING PATHWAY           | 30  | 0.02 | 2.43E-02 |
|              | transcription                             | 177 | 0.14 | 2.27E-27 |
|              | transcription regulation                  | 179 | 0.14 | 2.84E-27 |
|              | phosphorylation                           | 184 | 0.14 | 3.12E-18 |
|              | membrane                                  | 299 | 0.23 | 1.59E-16 |
|              | dna-binding                               | 147 | 0.11 | 4.22E-14 |
|              | nuclear protein                           | 250 | 0.19 | 4.68E-14 |
| SP-PIR       | developmental protein                     | 60  | 0.05 | 1.85E-10 |
|              | chromosomal translocation                 | 33  | 0.03 | 2.23E-10 |
|              | transmembrane                             | 268 | 0.21 | 2.24E-10 |
|              | activator                                 | 49  | 0.04 | 2.35E-10 |
|              |                                           |     |      |          |

|           |     |      |          |
|-----------|-----|------|----------|
| repressor | 38  | 0.03 | 2.93E-10 |
| calcium   | 71  | 0.06 | 4.09E-09 |
| transport | 108 | 0.08 | 6.33E-08 |

---

**Supplementary Table 4. Gene classes enriched in triNR- and tetraNR-containing genes associated with human genetic disease/phenotypic traits**

| Database | Enriched Term                      | Number of genes | % of genes | P-Value  | Fold Enrichment |
|----------|------------------------------------|-----------------|------------|----------|-----------------|
| GOBP     | development                        | 25              | 42         | 5.64E-09 | 3.65            |
|          | system development                 | 14              | 24         | 1.17E-08 | 7.88            |
|          | nervous system development         | 13              | 22         | 1.02E-07 | 7.38            |
|          | synaptic transmission              | 8               | 14         | 2.27E-05 | 9.11            |
|          | transmission of nerve impulse      | 8               | 14         | 3.11E-05 | 8.67            |
|          | cell-cell signaling                | 10              | 17         | 1.28E-04 | 5.00            |
|          | central nervous system development | 5               | 8          | 9.42E-04 | 11.24           |
|          | transcription regulator activity   | 16              | 27         | 1.50E-05 | 3.62            |
|          | transcription factor activity      | 13              | 22         | 4.65E-05 | 4.09            |
| GOMF     | sequence-specific DNA binding      | 8               | 14         | 4.44E-04 | 5.65            |
|          | protein binding                    | 27              | 46         | 5.21E-04 | 1.85            |
